# Supplementary material for: A displacement-type fluorescent probe reveals active species in the coordinative polymerization of olefins
Source: Royal Society of Chemistry journal article supplement (doi:10.1039/c7py01915g), 2017-12-26
Supplement: c7py01915g1.pdf [file c7py01915g1.pdf]

## Supporting Information

### Displacement Type Fluorescent Probe Reveals Active Species in Coordinative Polymerization of Olefin

Chao Yu, Pengfei Zhang, Fei Gao, Shaowen Zhang,\* Xiaofang Li\*

E-mail: xfli@bit.edu.cn

#### **Contents:**

|                                                                                                                                   |      |
|-----------------------------------------------------------------------------------------------------------------------------------|------|
| <b>Experimental Section</b> .....                                                                                                 | 4-14 |
| <b>SFigure 1.</b> <sup>1</sup> H NMR spectrum of <b>DPM</b> .....                                                                 | 6    |
| <b>SFigure 2.</b> <sup>1</sup> H NMR spectrum of the complex of <b>(DPM)<sub>2</sub>Sc(CH<sub>2</sub>SiMe<sub>3</sub>)</b> .....  | 7    |
| <b>SFigure 3.</b> <sup>13</sup> C NMR spectrum of the complex of <b>(DPM)<sub>2</sub>Sc(CH<sub>2</sub>SiMe<sub>3</sub>)</b> ..... | 8    |
| <b>SFigure 4.</b> <sup>1</sup> H NMR spectrum of the complex of <b>(DPM)AlMe<sub>2</sub></b> .....                                | 9    |
| <b>SFigure 5.</b> <sup>13</sup> C NMR spectrum of the complex of <b>(DPM)AlMe<sub>2</sub></b> .....                               | 10   |
| <b>SFigure 6.</b> <sup>1</sup> H NMR spectrum of the complex of <b>(DPM)AlEt<sub>2</sub></b> .....                                | 11   |
| <b>SFigure 7.</b> <sup>13</sup> C NMR spectrum of the complex of <b>(DPM)AlEt<sub>2</sub></b> .....                               | 11   |
| <b>SFigure 8.</b> <sup>1</sup> H NMR spectrum of the complex of<br><b>(DPM)Al<sup>i</sup>Bu<sub>2</sub></b> .....                 | 12   |

|                                                                                                                                                                                                                        |    |
|------------------------------------------------------------------------------------------------------------------------------------------------------------------------------------------------------------------------|----|
| <b>SFigure 9.</b> $^1\text{H}$ NMR spectrum of the complex of (DPM)Al <sup>i</sup> Bu <sub>2</sub> .....                                                                                                               | 13 |
| <b>SFigure 10.</b> $^1\text{H}$ NMR spectra of the polyisoprenes by complexes <b>1</b> /AlR <sub>3</sub> /Borate systems in Table 1.....                                                                               | 15 |
| <b>SFigure 11.</b> $^{13}\text{C}$ NMR spectra of the polyisoprenes by complexes <b>1</b> /AlR <sub>3</sub> /Borate systems in Table 1.....                                                                            | 16 |
| <b>SFigure 12.</b> GPC profiles of the polyisoprenes by complexes <b>1</b> /Al <sup>i</sup> Bu <sub>3</sub> /[Ph <sub>3</sub> C][B(C <sub>6</sub> F <sub>5</sub> ) <sub>4</sub> ] systems in Table 1, entry 1.....     | 17 |
| <b>SFigure 13.</b> GPC profiles of the polyisoprenes by complexes <b>1</b> / Al <sup>i</sup> Bu <sub>3</sub> /[PhMe <sub>2</sub> NH][B(C <sub>6</sub> F <sub>5</sub> ) <sub>4</sub> ] systems in Table 1, entry 2...17 |    |
| <b>SFigure 14.</b> GPC profiles of the polyisoprenes by complexes <b>1</b> /AlMe <sub>3</sub> /[Ph <sub>3</sub> C][B(C <sub>6</sub> F <sub>5</sub> ) <sub>4</sub> ] systems in Table 1, entry 4.....                   | 18 |
| <b>SFigure 15.</b> GPC profiles of the polyisoprenes by complexes <b>1</b> /AlMe <sub>3</sub> /[PhMe <sub>2</sub> NH][B(C <sub>6</sub> F <sub>5</sub> ) <sub>4</sub> ] systems in Table 1, entry 5...18                |    |
| <b>SFigure 16.</b> GPC profiles of the polyisoprenes by complexes <b>1</b> /Al <sup>i</sup> Bu <sub>3</sub> /[Ph <sub>3</sub> C][B(C <sub>6</sub> F <sub>5</sub> ) <sub>4</sub> ] systems in Table 1, entry 7.....     | 19 |
| <b>SFigure 17.</b> GPC profiles of the polyisoprenes by complexes <b>1</b> /Al <sup>i</sup> Bu <sub>3</sub> /[Ph <sub>3</sub> C][B(C <sub>6</sub> F <sub>5</sub> ) <sub>4</sub> ] systems in Table 1, entry 8.....     | 19 |
| <b>SFigure 18.</b> GPC profiles of the polyisoprenes by complexes <b>1</b> /Al <sup>i</sup> Bu <sub>3</sub> /[Ph <sub>3</sub> C][B(C <sub>6</sub> F <sub>5</sub> ) <sub>4</sub> ] systems in Table 1, entry 10.....    | 20 |
| <b>SFigure 19.</b> DSC charts of the polyisoprenes by complexes <b>1</b> /Al <sup>i</sup> Bu <sub>3</sub> /[Ph <sub>3</sub> C][B(C <sub>6</sub> F <sub>5</sub> ) <sub>4</sub> ] systems in Table 1, entry 1.....       | 20 |
| <b>SFigure 20.</b> DSC charts of the polyisoprenes by complexes <b>1</b> / Al <sup>i</sup> Bu <sub>3</sub> /[PhMe <sub>2</sub> NH][B(C <sub>6</sub> F <sub>5</sub> ) <sub>4</sub> ] systems in Table 1, entry 2.....   | 21 |
| <b>SFigure 21.</b> DSC charts of the polyisoprenes by the <b>1</b> /AlMe <sub>3</sub> /[Ph <sub>3</sub> C][B(C <sub>6</sub> F <sub>5</sub> ) <sub>4</sub> ] systems in Table 1, entry 4.....                           | 21 |
| <b>SFigure 22.</b> DSC charts of the polyisoprenes by the <b>1</b> /AlEt <sub>3</sub> /[Ph <sub>3</sub> C][B(C <sub>6</sub> F <sub>5</sub> ) <sub>4</sub> ] systems in Table 1, entry 6.....                           | 22 |
| <b>SFigure 23.</b> DSC charts of the polyisoprenes by the <b>1</b> / Al <sup>i</sup> Bu <sub>3</sub> /[Ph <sub>3</sub> C][B(C <sub>6</sub> F <sub>5</sub> ) <sub>4</sub> ] systems in Table 1, entry 7.....            | 22 |
| <b>SFigure 24.</b> DSC charts of the polyisoprenes by the <b>1</b> / Al <sup>i</sup> Bu <sub>3</sub> /[Ph <sub>3</sub> C][B(C <sub>6</sub> F <sub>5</sub> ) <sub>4</sub> ] systems in Table 1, entry 9.....            | 23 |
| <b>SFigure 25.</b> DSC charts of the polyisoprenes by the <b>1</b> / Al <sup>i</sup> Bu <sub>3</sub> /[Ph <sub>3</sub> C][B(C <sub>6</sub> F <sub>5</sub> ) <sub>4</sub> ] systems in Table 1, entry 11.....           | 23 |
| <b>SFigure 26.</b> DSC charts of the polyisoprenes by the <b>1</b> / Al <sup>i</sup> Bu <sub>3</sub> /[Ph <sub>3</sub> C][B(C <sub>6</sub> F <sub>5</sub> ) <sub>4</sub> ] systems in Table 1, entry 12.....           | 24 |

|                                                                                                                                                                                                                                                                                                                 |       |
|-----------------------------------------------------------------------------------------------------------------------------------------------------------------------------------------------------------------------------------------------------------------------------------------------------------------|-------|
| <b>SFigure 27.</b> DSC charts of the polyisoprenes by the <b>1</b> / Al <sup>i</sup> Bu <sub>3</sub> /[Ph <sub>3</sub> C][B(C <sub>6</sub> F <sub>5</sub> ) <sub>4</sub> ] systems in Table 1, entry 13.....                                                                                                    | 24    |
| <b>SFigure 28.</b> <i>In-situ</i> <sup>1</sup> H NMR spectra for the reaction of the complex <b>1</b> with AlMe <sub>3</sub> (1 M in toluene) under the molar ratio of [AlMe <sub>3</sub> ]/[Sc] as 1/1 at different time in C <sub>6</sub> D <sub>6</sub> at 25 °C.....                                        | 25    |
| <b>SFigure 29.</b> <i>In-situ</i> <sup>1</sup> H NMR spectra for the reaction of the complex <b>1</b> with AlMe <sub>3</sub> (1 M in toluene) under the molar ratio of [AlMe <sub>3</sub> ]/[Sc] as 5/1 at different time in C <sub>6</sub> D <sub>6</sub> at 25 °C.....                                        | 26    |
| <b>SFigure 30.</b> <i>In-situ</i> <sup>1</sup> H NMR spectra for the reaction of the complex <b>1</b> with AlMe <sub>3</sub> (1 M in toluene) under the molar ratio of [AlMe <sub>3</sub> ]/[Sc] as 10/1 at different time in C <sub>6</sub> D <sub>6</sub> at 25 °C.....                                       | 27    |
| <b>SFigure 31.</b> <i>In-situ</i> <sup>1</sup> H NMR spectra for the reaction of the complex <b>1</b> with AlMe <sub>3</sub> (1 M in toluene) at different the molar ratio at different time in C <sub>6</sub> D <sub>6</sub> at 25 °C.....                                                                     | 28    |
| <b>SFigure 32.</b> <i>In-situ</i> <sup>1</sup> H NMR spectra for the reaction of the complex <b>1</b> with AlEt <sub>3</sub> (0.6 M in heptane) under the molar ratio of [AlEt <sub>3</sub> ]/[Sc] as 5/1 at different time in C <sub>6</sub> D <sub>6</sub> at 25 °C.....                                      | 29    |
| <b>SFigure 33.</b> <i>In-situ</i> <sup>1</sup> H NMR spectra for the reaction of the complex <b>1</b> with Al <sup>i</sup> Bu <sub>3</sub> (1.1 M in toluene) under the molar ratio of [Al <sup>i</sup> Bu <sub>3</sub> ]/[Sc] as 5/1 and 10/1 at different time in C <sub>6</sub> D <sub>6</sub> at 25 °C..... | 30    |
| <b>SFigure 34.</b> <i>In-situ</i> <sup>1</sup> H NMR spectrum for the reaction of the complex <b>1</b> with AlMe <sub>3</sub> (1 M in toluene) under the molar ratio of [AlMe <sub>3</sub> ]/[Sc] as 5/1 after adding borate A in C <sub>6</sub> D <sub>6</sub> at 25 °C.....                                   | 31    |
| <b>SFigure 35.</b> Fluorescence spectrum of the polyisoprenes by the <b>1</b> /AlR <sub>3</sub> /[Ph <sub>3</sub> C][B(C <sub>6</sub> F <sub>5</sub> ) <sub>4</sub> ] systems in Table 1, entry 1, 4, 6...32                                                                                                    |       |
| <b>Table 1.</b> Crystal data, data collection and processing parameters for complexes <b>1-4</b> .....                                                                                                                                                                                                          | 32-46 |
| <b>SFigure 36.</b> <i>In-situ</i> <sup>1</sup> H NMR spectrum under different catalyst system in C <sub>6</sub> D <sub>6</sub> at 25 °C.....                                                                                                                                                                    | 47    |
| <b>SFigure 37.</b> The original <i>in-situ</i> <sup>1</sup> H NMR spectrum of SFigure 36 : 2-                                                                                                                                                                                                                   |       |

|                                                                                                                                                                                                                                                           |    |
|-----------------------------------------------------------------------------------------------------------------------------------------------------------------------------------------------------------------------------------------------------------|----|
| 2.....                                                                                                                                                                                                                                                    | 48 |
| <b>SFigure 38.</b> The original <i>in-situ</i> <sup>1</sup> H NMR spectrum of SFigure 36 :                                                                                                                                                                | 2- |
| 3.....                                                                                                                                                                                                                                                    | 48 |
| <b>SFigure 39.</b> The original <i>in-situ</i> <sup>1</sup> H NMR spectrum of SFigure 36 :                                                                                                                                                                | 2- |
| 4.....                                                                                                                                                                                                                                                    | 49 |
| <b>SFigure 40.</b> <sup>1</sup> H NMR and <sup>13</sup> CNMR spectra of the polyisoprenes by Sc(CH <sub>2</sub> SiMe <sub>3</sub> ) <sub>3</sub> (THF) <sub>2</sub> /AlR <sub>3</sub> /Borate A systems in CDCl <sub>3</sub> in Table 1, entry 14.....    | 49 |
| <b>SFigure 41.</b> GPC profiles of the polyisoprenes by Sc(CH <sub>2</sub> SiMe <sub>3</sub> ) <sub>3</sub> (THF) <sub>2</sub> /AlMe <sub>3</sub> /[Ph <sub>3</sub> C][B(C <sub>6</sub> F <sub>5</sub> ) <sub>4</sub> ] systems in Table 1, entry 14..... | 50 |

## Experimental Section

### Materials

All catalysts and the polymerization process were carried out in a nitrogen-filled MBraun glovebox. [Ph<sub>3</sub>C][B(C<sub>6</sub>F<sub>5</sub>)<sub>4</sub>], [PhMe<sub>2</sub>NH][B(C<sub>6</sub>F<sub>5</sub>)<sub>4</sub>], and B(C<sub>6</sub>F<sub>5</sub>)<sub>3</sub> were purchased from Tosoh Finechem Corporation and used as received. LiCH<sub>2</sub>SiMe<sub>3</sub> (1.0 M solution in pentane), Al<sup>*i*</sup>Bu<sub>3</sub> (1.1 M solution in hexane), AlMe<sub>3</sub> (1.0 M solution in Toluene) AlEt<sub>3</sub> (0.6 M solution in heptane) and LnCl<sub>3</sub> were purchased from Aldrich and Stream. 2,4,6-trimethylbenzaldehyde, 2,4-dimethylpyrrole, 2,3-dichloro-5,6-dicyano-1,4-benzoquinone (DDQ), trifluoroacetic acid (TFA), CaH<sub>2</sub>, dichloromethane, petroleum ether and methanol were purchased from Energy Chemistry and used as received. The Dipyrromethene (DPM)<sup>1</sup> and Ln(CH<sub>2</sub>SiMe<sub>3</sub>)<sub>3</sub>(THF)<sub>2</sub><sup>2</sup> were synthesized according to the literature. Isoprene were purchased from Aldrich and TCI, and dried through CaH<sub>2</sub>. Toluene,

---

<sup>1</sup> Fu, L.; Jiang, F.; Fortin, D.; Harvey, P. D.; Liu, Y. *Chem. Commun.*, **2011**, 47, 5503–5505.

<sup>2</sup> Li, X.; Nishiura, M.; Hu, L.; Mori, K.; Hou, Z. *J. Am. Chem. Soc.* **2009**, 131, 13870–13882.

hexane and THF were purified by a solvent purification system (SPS-800, Mbraun), and dried through Na in the glovebox. The deuterated solvents C<sub>6</sub>D<sub>6</sub> (99.6 atom% D) and CDCl<sub>3</sub>-d (99.8 atom% D) were obtained from Cambridge Isotope.

## General Methods

Samples of rare earth metal complexes for NMR spectroscopic measurements were prepared in the glovebox using J. Young valve NMR tubes. The NMR (<sup>1</sup>H, <sup>13</sup>C) spectra of catalyst precursors were recorded on an AVANCE 400 spectrometer at room temperature with C<sub>6</sub>D<sub>6</sub> as a solvent. <sup>1</sup>H, <sup>13</sup>C NMR spectra of polyisoprene samples obtained in this paper were recorded on an AVANCE 400 spectrometer in CDCl<sub>3</sub> at room temperature. Elemental analyses were performed on an Elementary Vario MICRO CUBE (Germany). The molecular weights and the molecular weight distributions of the polyisoprene samples were determined at 40 °C by gel permeation chromatography (GPC) on a WATERS 1515 apparatus. THF was employed as the eluent at a flow rate of 1 mL/min. The calibration was made by polystyrene standard EasiCal PS-1 (PL Ltd). The DSC measurements were performed on a TA 60 (TA Co.) at a rate of 10 °C/min. Any thermal history difference in the polymers was eliminated by first heating the specimen to 100 °C, cooling at 10 °C/min to -100 °C, and then recording the second DSC scan.

## X-ray Crystallographic Analysis

A crystal was sealed in oil under a microscope in the glove box. Data collections were performed at -100 °C on a Bruker Smart-Apex CCD diffractometer with a CCD area detector using graphite-monochromated Mo K $\alpha$  radiation ( $\lambda = 0.71073 \text{ \AA}$ ). The determination of crystal class and unit cell parameters was carried out by the SMART program package. The raw frame data were processed using SAINT and SADABS to yield the reflection data file. The structures were solved by using SHELXTL-97 program. Refinements were performed on F2 anisotropically for all the non-hydrogen atoms by the full-matrix least-squares method. The analytical scattering factors for neutral atoms were used throughout the analysis. The non-hydrogen atoms were refined anisotropically. The hydrogen atoms were placed at the calculated positions and were included in the structure calculation without further refinement of the parameters. The residual electron densities were of no chemical significance. Crystallographic data (excluding structure factors) have been deposited with the Cambridge Crystallographic Data Centre as supplementary publication nos. CCDC-1543893 (**1**), 1543892 (**2**), 1552494 (**3**), and 1552495 (**4**) contain the

supplementary crystallographic data for this paper. These data can be obtained free of charge from The Cambridge Crystallographic Data Centre via [www.ccdc.cam.ac.uk/data\\_request/cif](http://www.ccdc.cam.ac.uk/data_request/cif).

**Synthesis of Dipyrrromethene (DPM).** A 500mL round-bottom flask equipped with a magnetic stirring bar, dry argon inlet and septum was successively charged with 2,4,6-trimethylbenzaldehyde (508  $\mu$ L, 5 mmol), dichloromethane (250 mL), and 2,4-dimethylpyrrole (1.03 mL, 10 mmol). The reaction mixture was stirred 10 min and TFA (3 drops) was added. The resulted dark red solution was stirred at 20 °C overnight. TLC monitoring showed then complete consumption of benzaldehyde (silica; EtOAc/cyclohexane 1:4). A suspension of 2,3-dichloro-5,6-dicyano-1,4-benzoquinone (1.2 g, 5.3 mmol) in dichloromethane (60 mL) was added and stirring was continued for 30 min. The reaction mixture was washed with water (100 mL), the organic phase was dried over Na<sub>2</sub>SO<sub>4</sub>, filtered and the volatiles were evaporated under reduced pressure. The black crude material was purified by chromatography over aluminum oxide (CH<sub>2</sub>Cl<sub>2</sub> to CH<sub>2</sub>Cl<sub>2</sub>/MeOH 99:1) to give a khaki powder-- DPM (720 mg, yield 52%). <sup>1</sup>H NMR (400 MHz, C<sub>6</sub>D<sub>6</sub>)  $\delta$  14.08 (s, 1H), 6.77 (s, 2H), 5.85 (s, 2H), 2.19 (s, 6H), 2.12 (s, 9H), 1.52 (s, 6H).

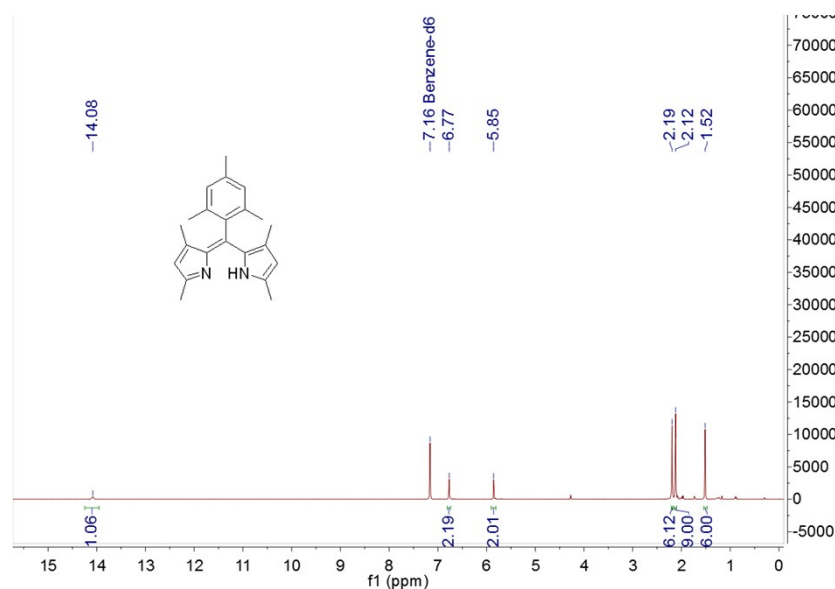

**SFigure 1.**  $^1\text{H}$  NMR spectrum of DPM.

**Synthesis of Rare Earth Scandium Monoalkyl Complex 1 -  $(\text{DPM})_2\text{ScCH}_2\text{SiMe}_3$ .** To a colorless toluene solution (5 mL) of  $\text{Sc}(\text{CH}_2\text{SiMe}_3)_3(\text{THF})_2$  (0.283 g, 0.628 mmol) was added a solution of DPM (0.2 g, 0.628 mmol) in toluene (5.0mL) at room temperature. The mixture was stirred at room temperature for 4 h. After removal of all volatiles in vacuo, the residue was recrystallized from hexane at  $-30\text{ }^\circ\text{C}$  to give complex **1** as red powder (0.14 g, yield 30%). Quantum Yield: 0.14.  $^1\text{H}$  NMR (400 MHz,  $\text{C}_6\text{D}_6$ )  $\delta$  6.79 (s, 4H), 5.89 (s, 4H), 2.34 (s, 18H), 2.14 (s, 12H), 1.49 (s, 12H), 0.09 (s, 9H), -0.04 (s, 2H).  $^{13}\text{C}$  NMR(100MHz,  $\text{C}_6\text{D}_6$ )  $\delta$  145.45, 138.01, 136.52, 136.22, 129.34, 21.22, 17.52, 15.22, 14.35, 4.01, 0.03. Anal. Calcd (%) for  $\text{C}_{48}\text{H}_{61}\text{N}_4\text{ScSi}$ : C, 75.16; H, 8.02; N, 7.30. Found: C, 74.79; H, 7.65; N, 6.92.

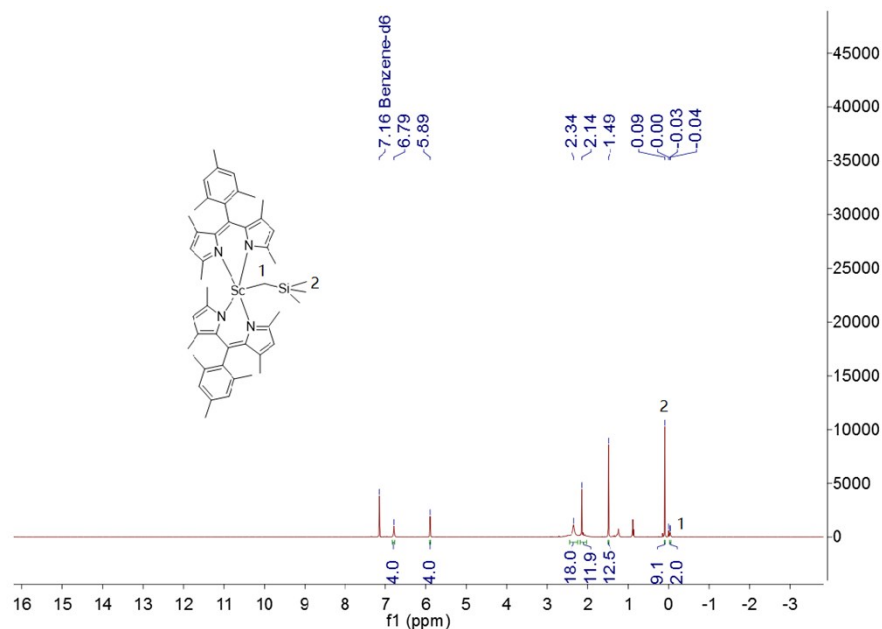

**SFigure 2.**  $^1\text{H}$  NMR spectrum of the complex of  $(\text{DPM})_2\text{Sc}(\text{CH}_2\text{SiMe}_3)$ .

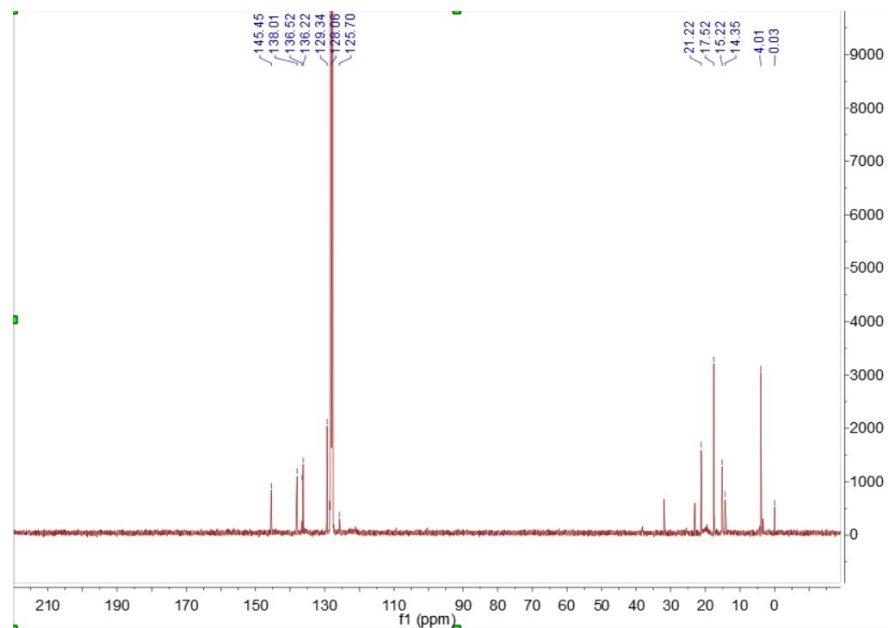

**Figure 3.**  $^{13}\text{C}$  NMR spectrum of the complex of  $(\text{DPM})_2\text{Sc}(\text{CH}_2\text{SiMe}_3)$ .

**Synthesis of Aluminum Dialkyl Complex 2 -  $(\text{DPM})\text{AlMe}_2$ .** In the glovebox, to a round-bottom flask equipped with a magnetic stirring bar was added to DPM (300 mg, 942  $\mu\text{mol}$ ) in Toluene (10 mL), then  $\text{AlMe}_3$  (0.95 ml, 945  $\mu\text{mol}$ , 1.0M in Toluene) was then slowly added to provide a dark green solution. After 4h, the volatiles were evaporated under reduced pressure. The brown crude material was purified by recrystallization from hexane to provide brown powder ( $(\text{DPM})\text{AlMe}_2$ ) (254 mg, yield 90%). Quantum Yield: 0.066.  $^1\text{H}$  NMR (400 MHz,  $\text{C}_6\text{D}_6$ )  $\delta$  6.69 (s, 2H), 5.82 (s, 2H), 2.33 (s, 6H), 2.00 (s, 3H), 1.39 (s, 6H), -0.10 (s, 6H).  $^{13}\text{C}$  NMR(100MHz,  $\text{C}_6\text{D}_6$ )  $\delta$  156.93, 144.7, 138.32, 135.82, 135.19, 133.91, 129.42, 122.22, ,



23.17, 21.26, 19.45, 16.19, 14.95,. Anal. Calcd (%) for  $C_{24}H_{31}AlN_2$ : C, 76.97; H, 8.34; N, 7.48. Found: C, 76.88; H, 8.14; N, 7.14.

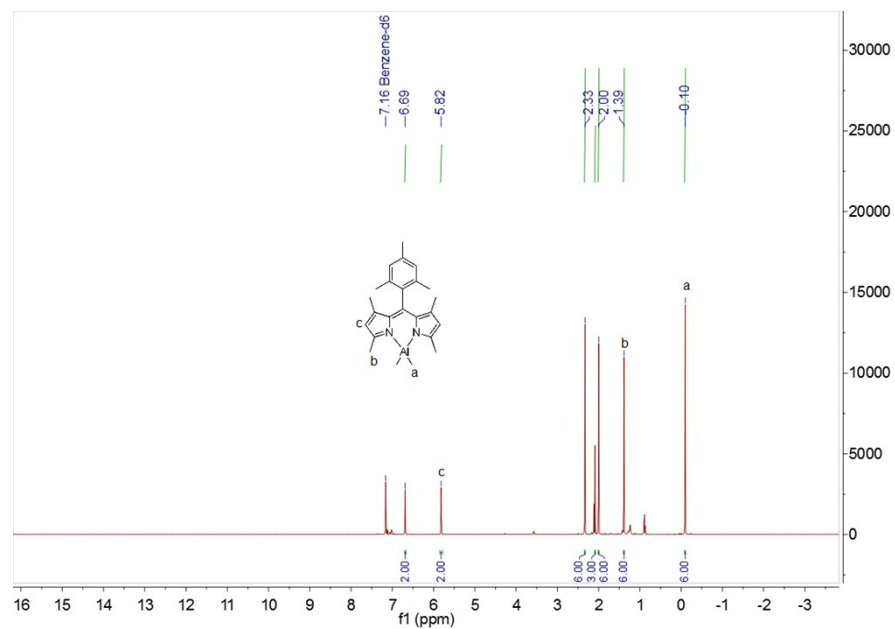

**Figure 4.**  $^1H$  NMR spectrum of the complex of (DPM)AlMe<sub>2</sub>.

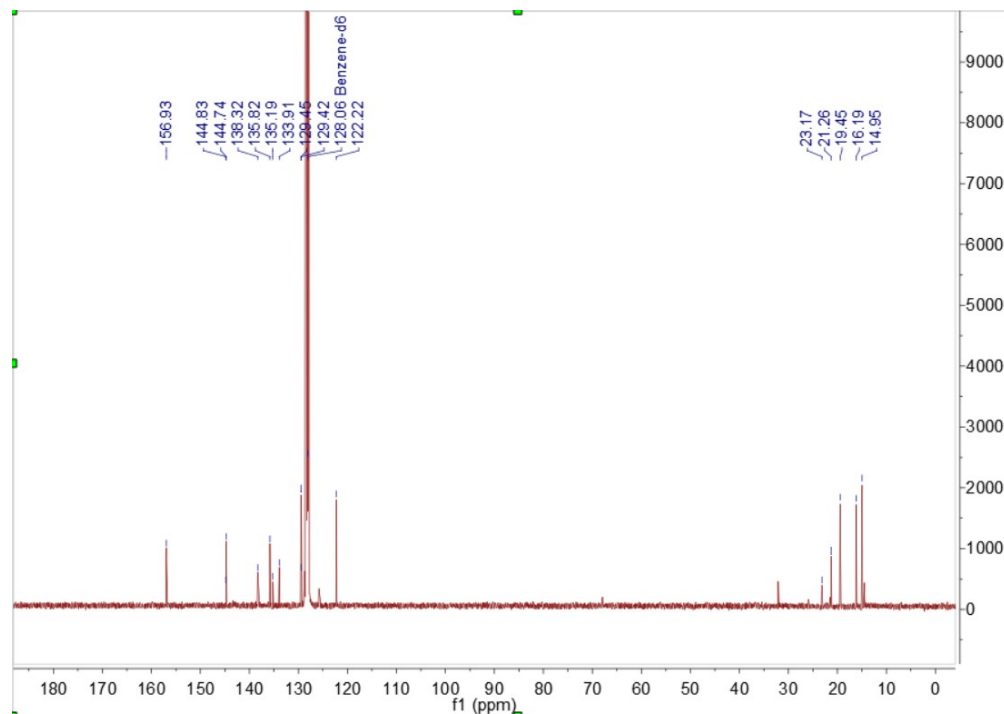

**Figure 5.**  $^{13}\text{C}$  NMR spectrum of the complex of  $(\text{DPM})\text{AlMe}_2$ .

**Synthesis of Aluminum Dialkyl Complex 3 -  $(\text{DPM})\text{AlEt}_2$**  The synthesis procedure is similar to  $(\text{DPM})\text{AlMe}_2$ , yield: 89%.  $^1\text{H}$  NMR (400 MHz,  $\text{C}_6\text{D}_6$ )  $\delta$  6.69 (s, 2H), 5.83 (s, 2H), 2.34 (s, 6H), 2.09 (s, 3H), 2.03 (s, 6H), 1.39 (s, 6H), 1.32-1.28 (t,  $J = 8$  Hz, 6H), 0.55-0.49 (q,  $J = 8$  Hz, 4H);  $^{13}\text{C}$  NMR (100MHz,  $\text{C}_6\text{D}_6$ )  $\delta$  156.55, 144.71, 144.52, 138.19, 135.65, 135.12, 134.17, 129.3, 122.00, 23.06, 21.16, 19.27, 15.95, 14.90, 9.80. Anal. Calcd (%) for  $\text{C}_{26}\text{H}_{35}\text{AlN}_2$ : C, 77.57; H, 8.76; N, 6.96. Found: C, 77.67; H, 8.86; N, 7.06.

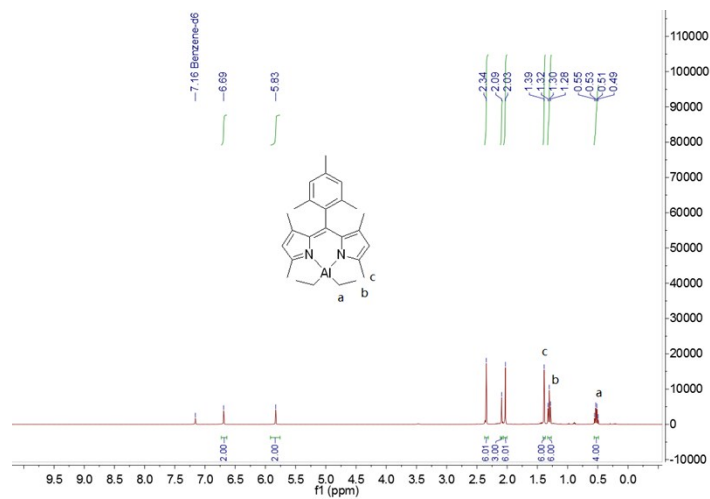

**Figure 6.** <sup>1</sup>H NMR spectrum of the complex of (DPM)AlEt<sub>2</sub>.

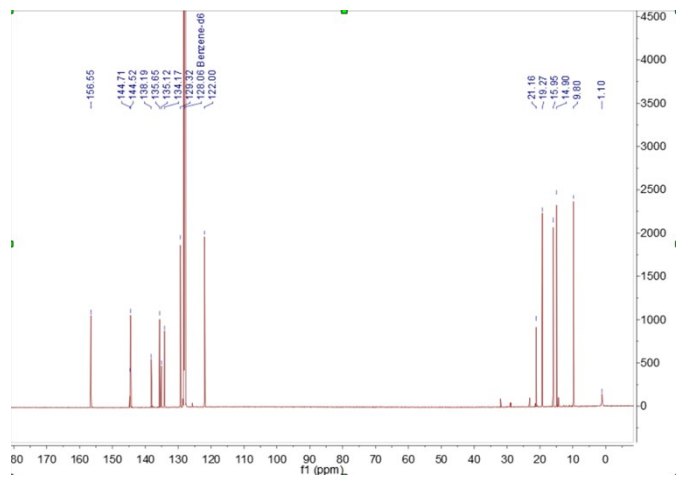

**Figure 7.** <sup>13</sup>C NMR spectrum of the complex of (DPM)AlEt<sub>2</sub>.

**Synthesis Aluminum Dialkyl Complex 4 - (DPM)Al<sup>i</sup>Bu<sub>2</sub>** The synthesis procedure is similar to (DPM)AlMe<sub>2</sub>, yield: 85%. <sup>1</sup>H NMR (400 MHz, C<sub>6</sub>D<sub>6</sub>) δ 6.71 (s, 2H), 5.82 (s, 2H), 2.40 (s, 6H), 2.34 (s, 6H), 2.10 (s, 3H), 2.09 (s, 6H), 2.0-1.93 (m, 2H), 1.39 (s, 6H), 1.08-1.07 (d, *J* = 4 Hz, 12H), 0.56-0.54 (d, *J* = 8 Hz, 4H); <sup>13</sup>C NMR (100MHz, C<sub>6</sub>D<sub>6</sub>) δ 156.58, 144.71, 144.56, 138.26, 135.67, 133.67, 129.40, 122.17, 28.15, 27.18, 21.17, 19.35, 16.24, 14.97. Anal. Calcd (%) for C<sub>30</sub>H<sub>43</sub>AlN<sub>2</sub>: C, 78.56; H, 9.45; N, 6.11. Found: C, 78.36; H, 9.28; N, 5.85.

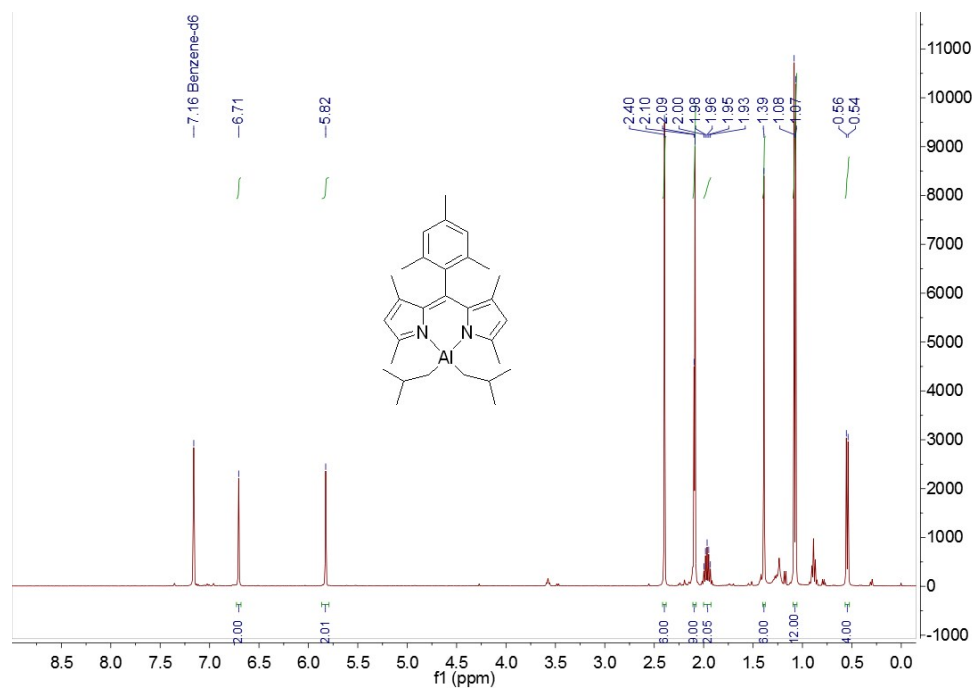

**SFigure 8.** <sup>1</sup>H NMR spectrum of the complex of (DPM)Al<sup>i</sup>Bu<sub>2</sub>.

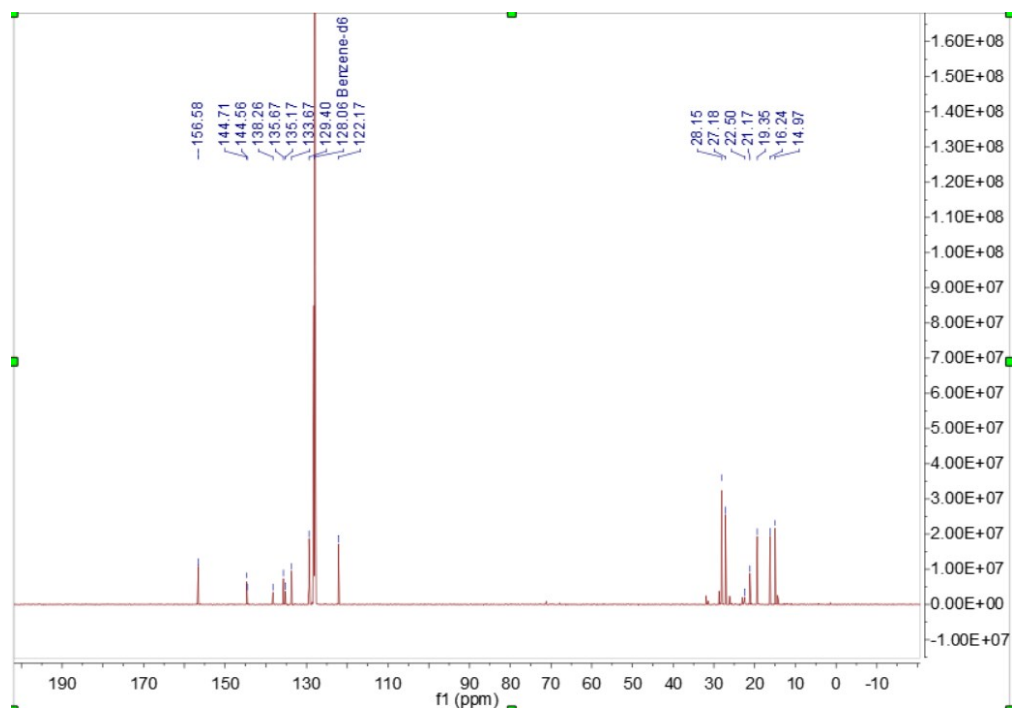

**Figure 9.**  $^1\text{H}$  NMR spectrum of the complex of  $(\text{DPM})\text{Al}^i\text{Bu}_2$ .

### A Typical Procedure for the Polymerization of Isoprene by complexes 1/Activator/ $\text{AlR}_3$ systems

In a glovebox, to a toluene solution (10 ml) was slowly added to  $\text{AlMe}_3$  (1M Tol) (0.2 mL, 0.02 mmol) under magnetic stirring in a flask, then  $(\text{DPM})_2\text{Sc}(\text{CH}_2\text{SiMe}_3)$  (15.34mg, 0.02 mmol) was added. After the mixture was stirred for 5 min, a toluene solution (1.0 mL) of Borate (0.02 mmol) was slowly added to the resulting solution, and isoprene (0.39 g, 4 mmol) were added. The polymerization was quenched by addition of ethanol (30 mL, containing 5% butylhydroxytoluene (BHT) as

a stabilizing agent). Then the mixture was poured into methanol (100 mL) to precipitate the polymer product. The precipitated polymer was dried under vacuum at 40 °C to a constant weight.

The isomer contents of the polyisoprene products were calculated from the  $^1\text{H}$  and  $^{13}\text{C}$  NMR spectra according to the following formula (1–5):

$$(1) \text{ Mol } 1,4\text{-IP}\% = \{I_{\text{H}1} / (I_{\text{H}1} + 0.5I_{\text{H}2})\} * 100$$

$$(2) \text{ Mol } 3,4\text{-IP}\% = \{0.5I_{\text{H}2} / (I_{\text{H}1} + 0.5I_{\text{H}2})\} * 100$$

in which  $I_{\text{H}1}$  is the integration of the resonance at 5.13 ppm (one vinyl proton of the 1,4-isoprene unit), and  $I_{\text{H}2}$  is the integration of the resonance at 4.72 ppm (two vinyl protons of the 3,4-isoprene unit) in the  $^1\text{H}$  NMR spectrum.

$$(3) \text{ Mol } \textit{cis}\text{-}1,4\text{-IP}\% = \{I_{\text{C}1} / (I_{\text{C}1} + I_{\text{C}2} + I_{\text{C}3})\} * 100$$

$$(4) \text{ Mol } \textit{trans}\text{-}1,4\text{-IP}\% = \{I_{\text{C}3} / (I_{\text{C}1} + I_{\text{C}2} + I_{\text{C}3})\} * 100$$

$$(5) \text{ Mol } 3,4\text{-IP}\% = \{I_{\text{C}2} / (I_{\text{C}1} + I_{\text{C}2} + I_{\text{C}3})\} * 100$$

in which  $I_{\text{C}1}$  is the integration of the signals at 23.2 ppm assigned as the methyl carbon of the *cis*-1,4-isoprene unit, and  $I_{\text{C}2}$  is the integration of the signals at 18.5 ppm assigned as the methyl carbon of the 3,4-isoprene unit, while  $I_{\text{C}3}$  is the integration of the signals at 15.9 ppm assigned as the methyl carbon of the *trans*-1,4-isoprene unit in the  $^{13}\text{C}$  NMR spectrum.

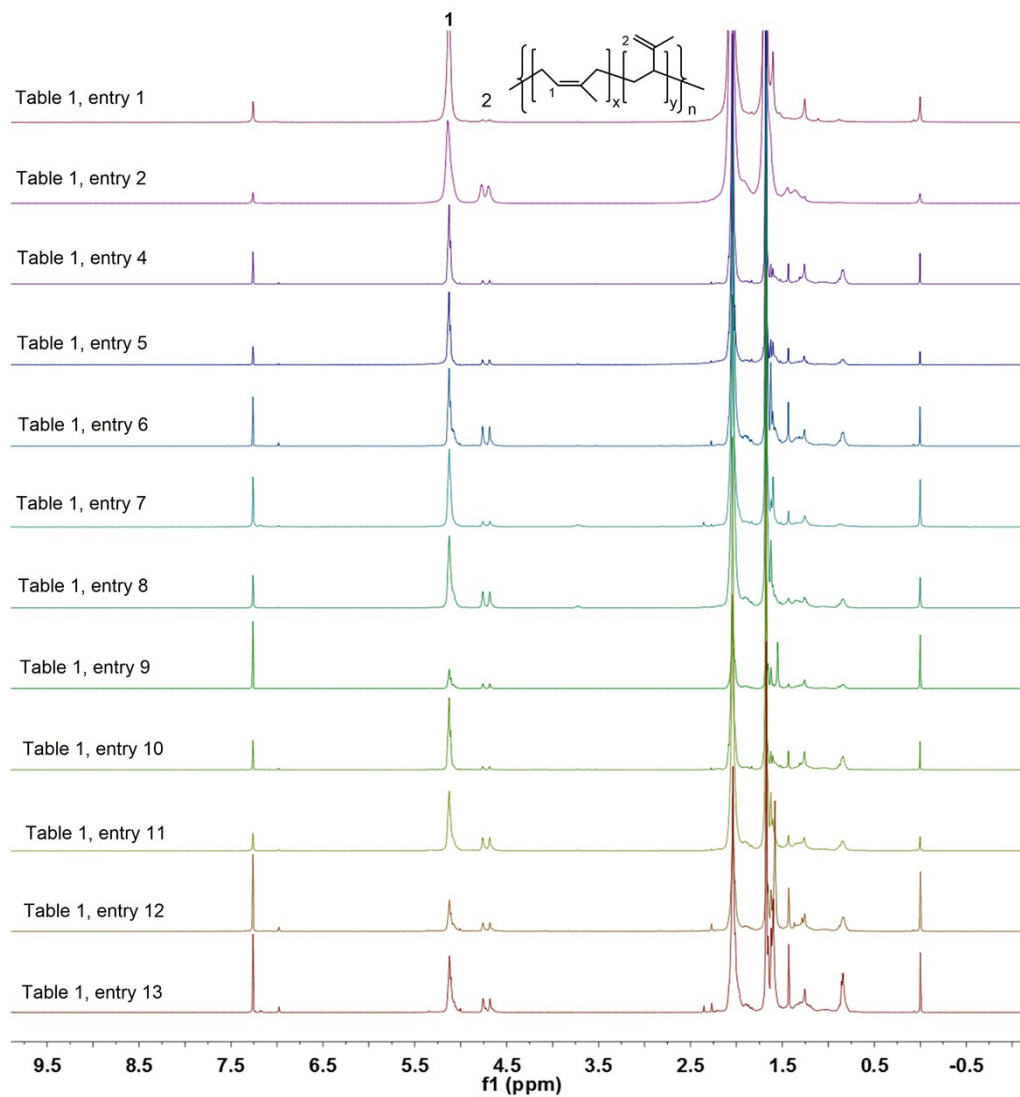

**SFigure 10.**  $^1\text{H}$  NMR spectra of the polyisoprenes by complexes **1**/ $\text{AlR}_3$ /Borate systems in Table 1.

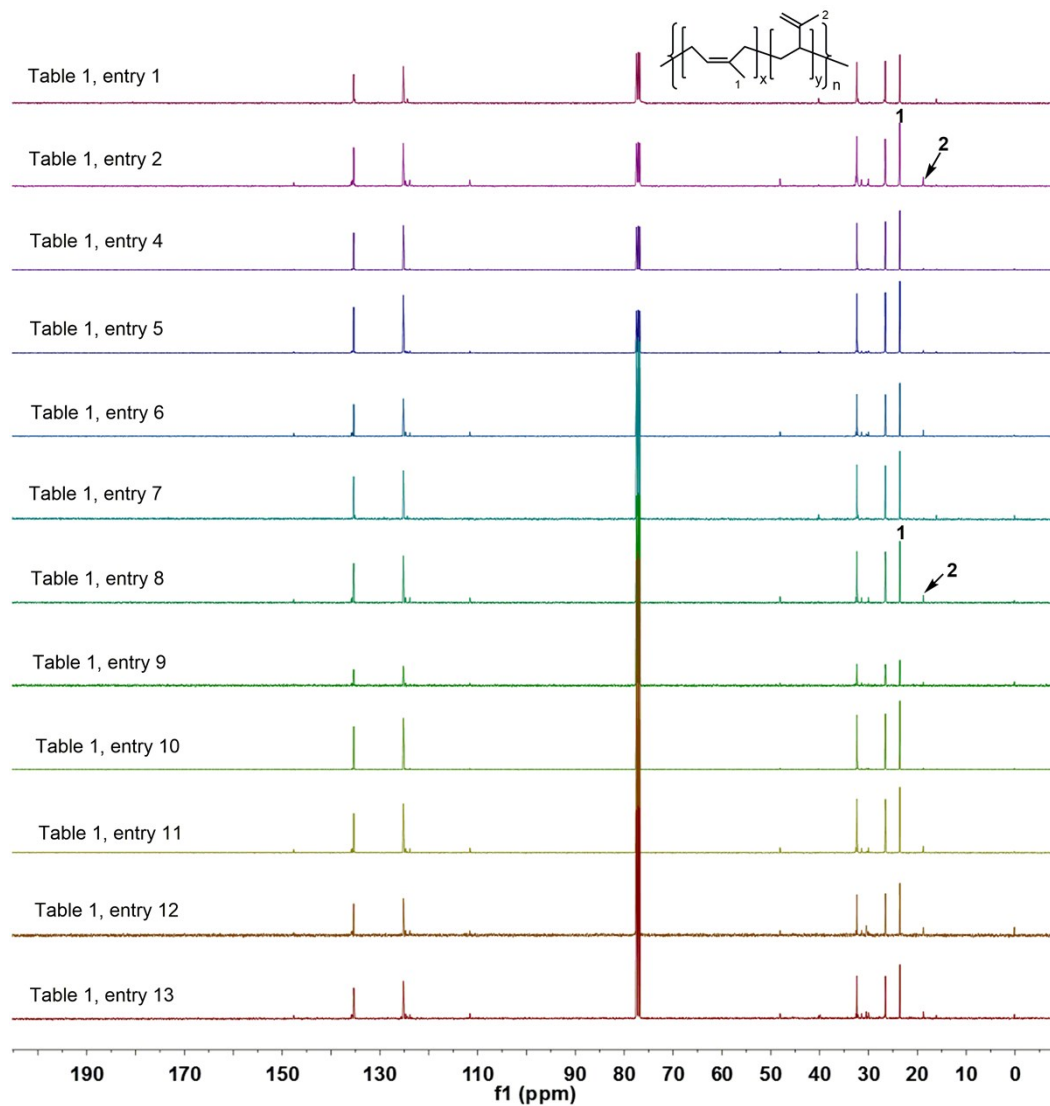

**Figure 11.**  $^{13}\text{C}$  NMR spectra of the polyisoprenes by complexes **1**/  $\text{AlR}_3$ / Borate systems in Table 1.



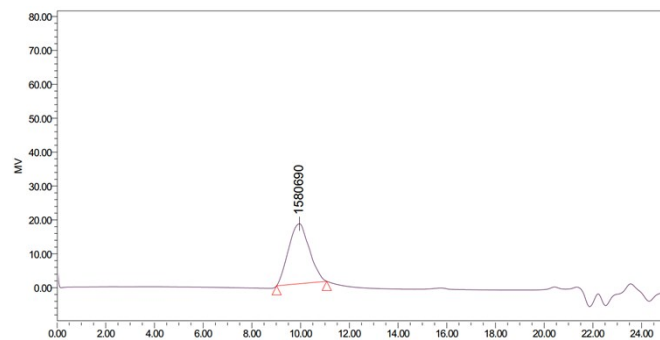

**GPC Results**

|   | Dist Name | Elution Volume (ml) | Retention Time (min) | Adjusted RT (min) | Mn      | Mw      | MP      | Mz      | Mz+1    | Mz/Mw    |
|---|-----------|---------------------|----------------------|-------------------|---------|---------|---------|---------|---------|----------|
| 1 |           | 9.952               | 9.952                | 9.952             | 1376828 | 1923729 | 1580690 | 2634128 | 3400809 | 1.369282 |

**SFigure 12.** GPC profiles of the polyisoprenes by complexes **1**/ $\text{Al}^i\text{Bu}_3$ / $[\text{Ph}_3\text{C}][\text{B}(\text{C}_6\text{F}_5)_4]$  systems in Table 1, entry 1.

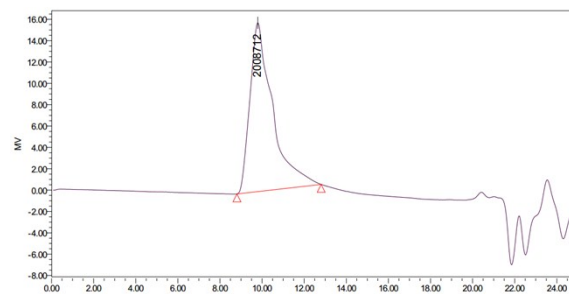

**GPC Results**

|   | Dist Name | Elution Volume (ml) | Retention Time (min) | Adjusted RT (min) | Mn     | Mw      | MP      | Mz      | Mz+1    | Mz/Mw    |
|---|-----------|---------------------|----------------------|-------------------|--------|---------|---------|---------|---------|----------|
| 1 |           | 9.800               | 9.800                | 9.800             | 757427 | 1781311 | 2008712 | 2904021 | 3951558 | 1.630271 |

**SFigure 13.** GPC profiles of the polyisoprenes by complexes **1**/ $\text{Al}^i\text{Bu}_3$ / $[\text{PhMe}_2\text{NH}][\text{B}(\text{C}_6\text{F}_5)_4]$  systems in Table 1, entry 2.

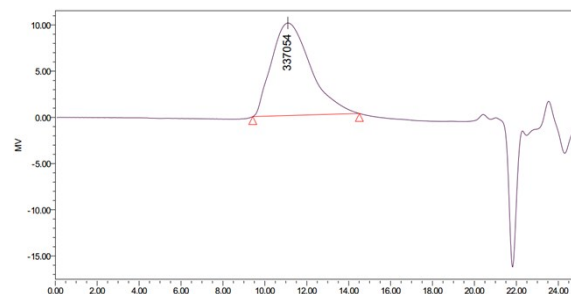

**GPC Results**

| Dist Name | Elution Volume (ml) | Retention Time (min) | Adjusted RT (min) | Mn     | Mw     | MP     | Mz     | Mz+1    | Mz/Mw    |
|-----------|---------------------|----------------------|-------------------|--------|--------|--------|--------|---------|----------|
| 1         | 11.095              | 11.095               | 11.095            | 171726 | 410806 | 337054 | 837126 | 1312224 | 2.037763 |

**Figure 14.** GPC profiles of the polyisoprenes by complexes **1**/AlMe<sub>3</sub>/[Ph<sub>3</sub>C][B(C<sub>6</sub>F<sub>5</sub>)<sub>4</sub>] systems in Table 1, entry 4.

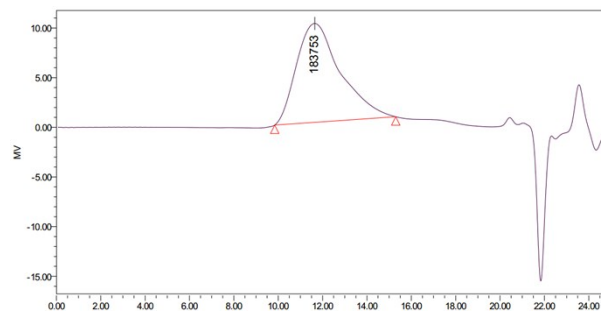

**GPC Results**

| Dist Name | Elution Volume (ml) | Retention Time (min) | Adjusted RT (min) | Mn    | Mw     | MP     | Mz     | Mz+1   | Mz/Mw    |
|-----------|---------------------|----------------------|-------------------|-------|--------|--------|--------|--------|----------|
| 1         | 11.647              | 11.647               | 11.647            | 98041 | 213433 | 183753 | 409603 | 643564 | 1.919114 |

**Figure 15.** GPC profiles of the polyisoprenes by complexes **1**/AlMe<sub>3</sub>/[PhMe<sub>2</sub>NH][B(C<sub>6</sub>F<sub>5</sub>)<sub>4</sub>] systems in Table 1, entry 5.

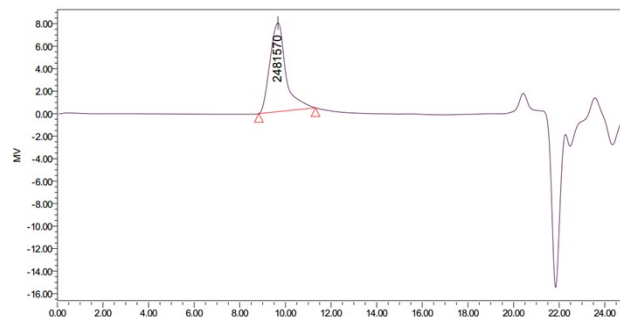

**GPC Results**

| Dist Name | Elution Volume (ml) | Retention Time (min) | Adjusted RT (min) | Mn      | Mw      | MP      | Mz      | Mz+1    | Mz/Mw    |
|-----------|---------------------|----------------------|-------------------|---------|---------|---------|---------|---------|----------|
| 1         | 9.670               | 9.670                | 9.670             | 1851001 | 2721874 | 2481570 | 3576070 | 4418169 | 1.313827 |

**Figure 16.** GPC profiles of the polyisoprenes by complexes  $1/Al^iBu_3/[Ph_3C][B(C_6F_5)_4]$  systems in Table 1, entry 7.

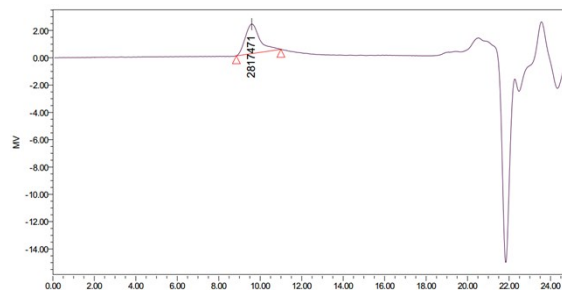

**GPC Results**

| Dist Name | Elution Volume (ml) | Retention Time (min) | Adjusted RT (min) | Mn      | Mw      | MP      | Mz      | Mz+1    | Mz/Mw    |
|-----------|---------------------|----------------------|-------------------|---------|---------|---------|---------|---------|----------|
| 1         | 9.594               | 9.594                | 9.594             | 1998640 | 2868556 | 2817471 | 3742573 | 4578301 | 1.304689 |

**Figure 17.** GPC profiles of the polyisoprenes by complexes  $1/Al^iBu_3/[Ph_3C][B(C_6F_5)_4]$  systems in Table 1, entry 8.

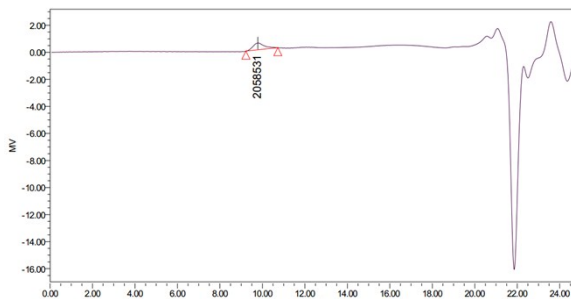

**GPC Results**

| Dist Name | Elution Volume (ml) | Retention Time (min) | Adjusted RT (min) | Mn      | Mw      | MP      | Mz      | Mz+1    | Mz/Mw    |
|-----------|---------------------|----------------------|-------------------|---------|---------|---------|---------|---------|----------|
| 1         | 9.785               | 9.785                | 9.785             | 1679489 | 1994521 | 2058531 | 2306195 | 2602445 | 1.156265 |

**SFigure 18.** GPC profiles of the polyisoprenes by complexes **1**/Al<sup>i</sup>Bu<sub>3</sub>/[Ph<sub>3</sub>C][B(C<sub>6</sub>F<sub>5</sub>)<sub>4</sub>] systems in Table 1, entry 10.

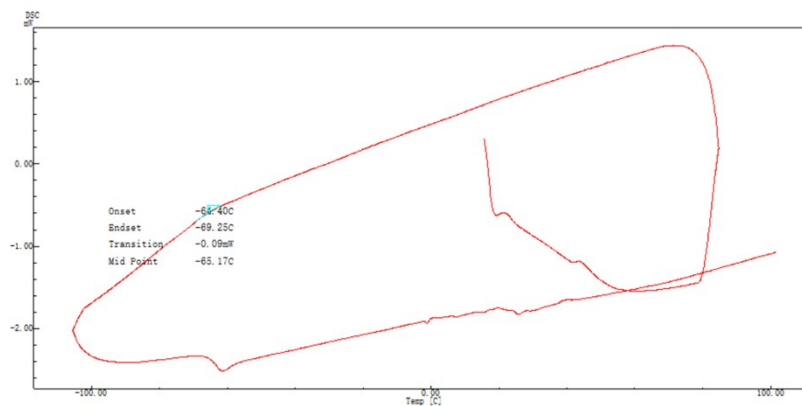

**SFigure 19.** DSC charts of the polyisoprenes by complexes **1**/Al<sup>i</sup>Bu<sub>3</sub>/[Ph<sub>3</sub>C][B(C<sub>6</sub>F<sub>5</sub>)<sub>4</sub>] systems in Table 1, entry 1.

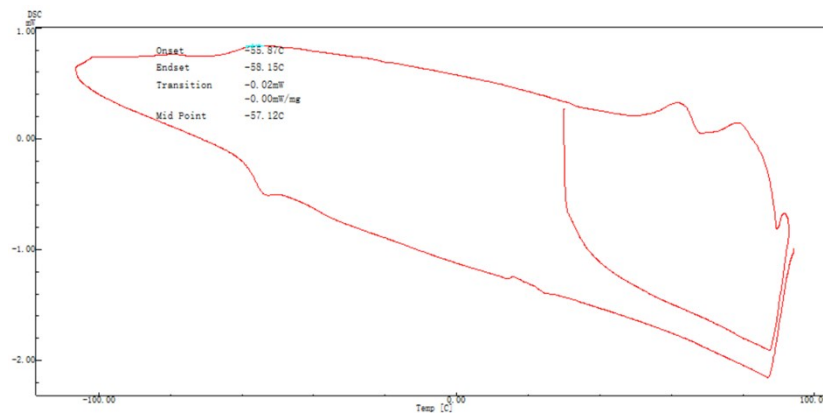

**Figure 20.** DSC charts of the polyisoprenes by complexes **1**/ Al<sup>i</sup>Bu<sub>3</sub>/[PhMe<sub>2</sub>NH][B(C<sub>6</sub>F<sub>5</sub>)<sub>4</sub>] systems in Table 1, entry 2.

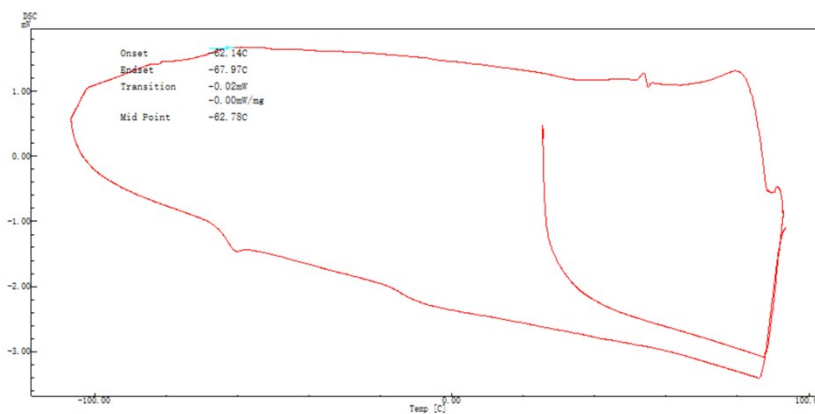

**Figure 21.** DSC charts of the polyisoprenes by the **1**/AlMe<sub>3</sub>/[Ph<sub>3</sub>C][B(C<sub>6</sub>F<sub>5</sub>)<sub>4</sub>] systems in Table 1, entry 4.

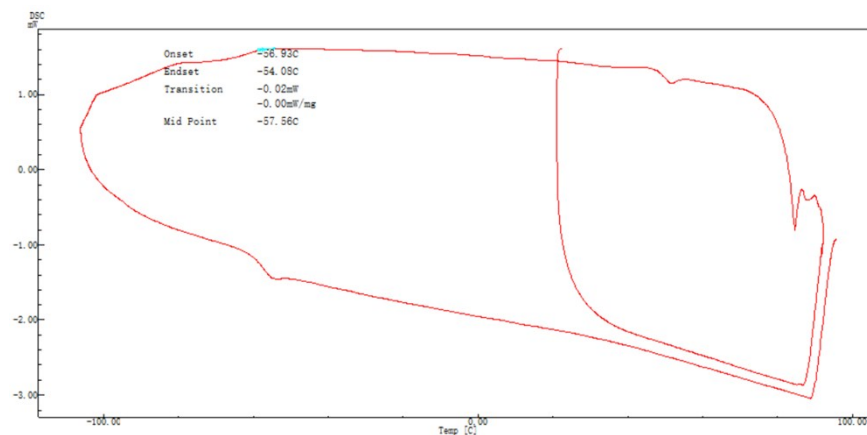

**SFigure 22.** DSC charts of the polyisoprenes by the  $1/\text{AlEt}_3/[\text{Ph}_3\text{C}][\text{B}(\text{C}_6\text{F}_5)_4]$  systems in Table 1, entry 6.

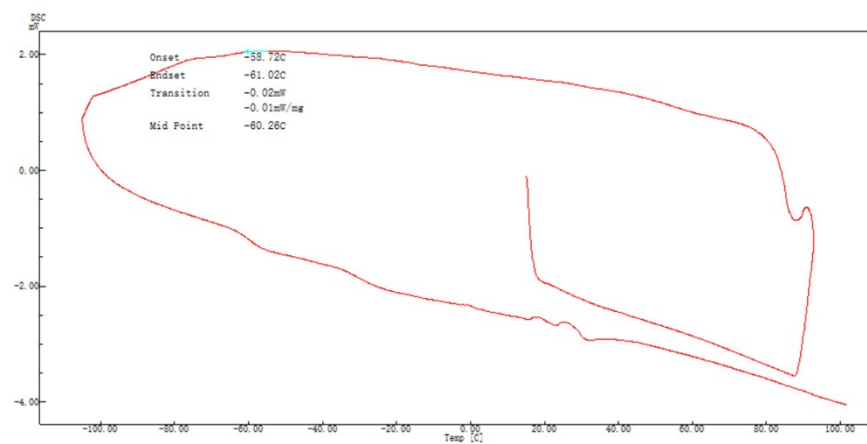

**SFigure 23.** DSC charts of the polyisoprenes by the  $1/\text{Al}^t\text{Bu}_3/[\text{Ph}_3\text{C}][\text{B}(\text{C}_6\text{F}_5)_4]$  systems in Table 1, entry 7.

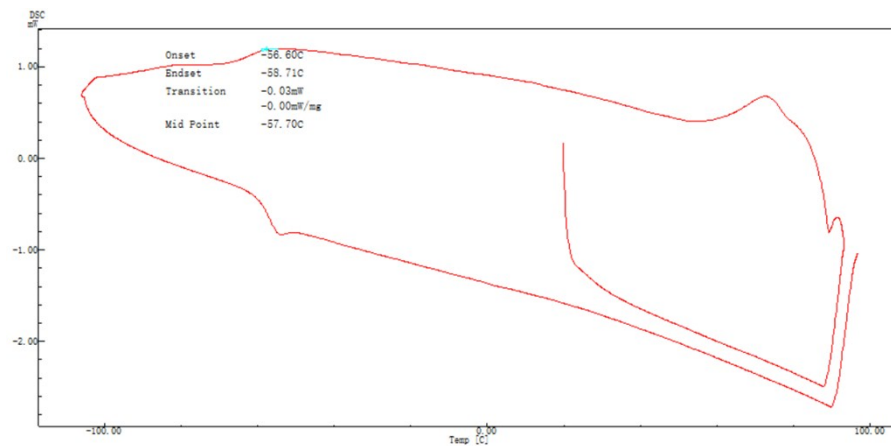

**SFigure 24.** DSC charts of the polyisoprenes by the **1/ Al<sup>t</sup>Bu<sub>3</sub>/[Ph<sub>3</sub>C][B(C<sub>6</sub>F<sub>5</sub>)<sub>4</sub>]** systems in Table 1, entry 9.

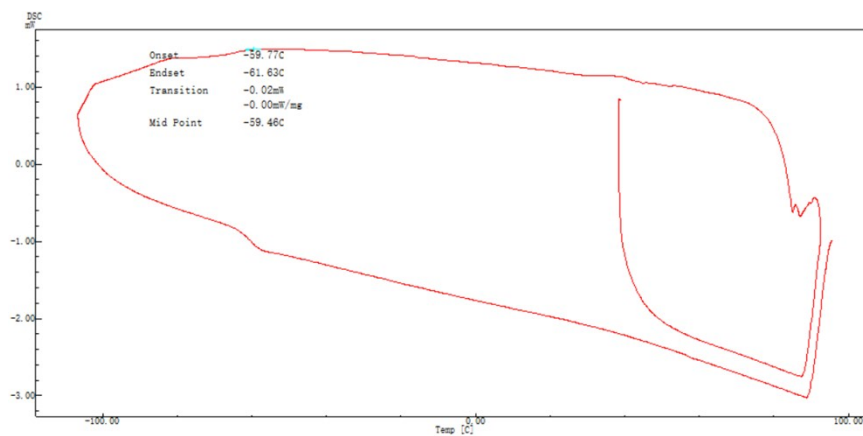

**SFigure 25.** DSC charts of the polyisoprenes by the **1/ Al<sup>t</sup>Bu<sub>3</sub>/[Ph<sub>3</sub>C][B(C<sub>6</sub>F<sub>5</sub>)<sub>4</sub>]** systems in Table 1, entry 11.

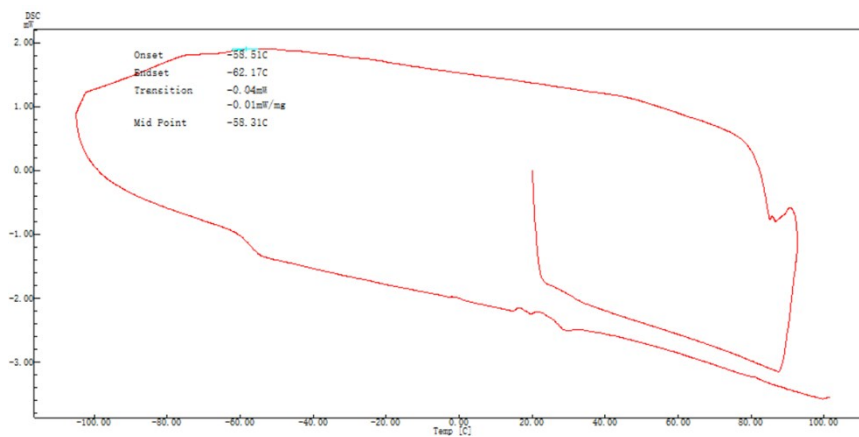

**Figure 26.** DSC charts of the polyisoprenes by the  $1/ \text{Al}^i\text{Bu}_3/[\text{Ph}_3\text{C}][\text{B}(\text{C}_6\text{F}_5)_4]$  systems in Table 1, entry 12.

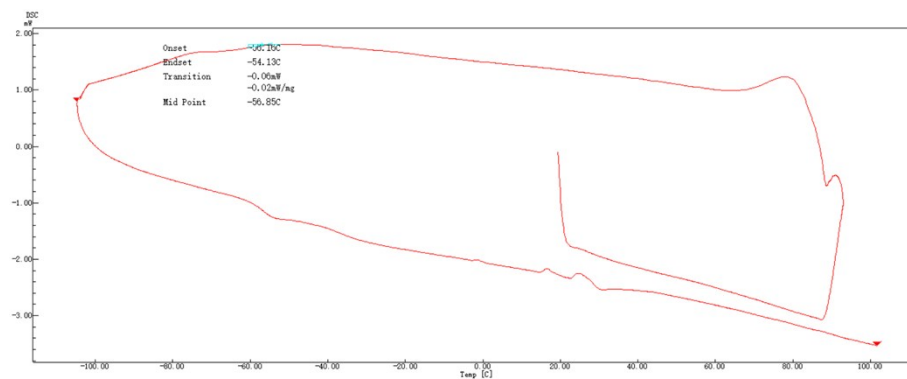

**Figure 27.** DSC charts of the polyisoprenes by the  $1/ \text{Al}^i\text{Bu}_3/[\text{Ph}_3\text{C}][\text{B}(\text{C}_6\text{F}_5)_4]$  systems in Table 1, entry 13.



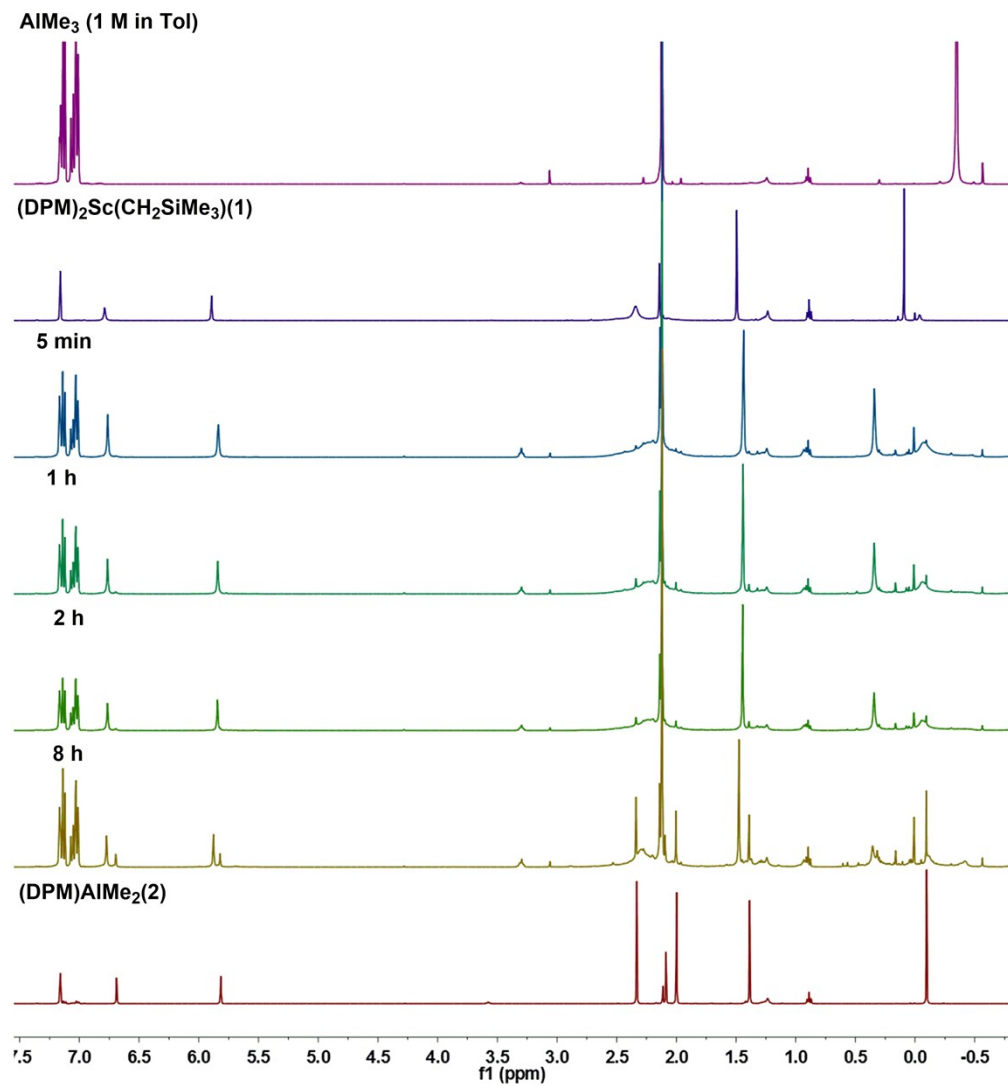

**Figure 28.** *In-situ*  $^1\text{H}$  NMR spectra for the reaction of the complex **1** with  $\text{AlMe}_3$  (1 M in toluene) under the molar ratio of  $[\text{AlMe}_3]/[\text{Sc}]$  as 1/1 at different time in  $\text{C}_6\text{D}_6$  at  $25^\circ\text{C}$ .

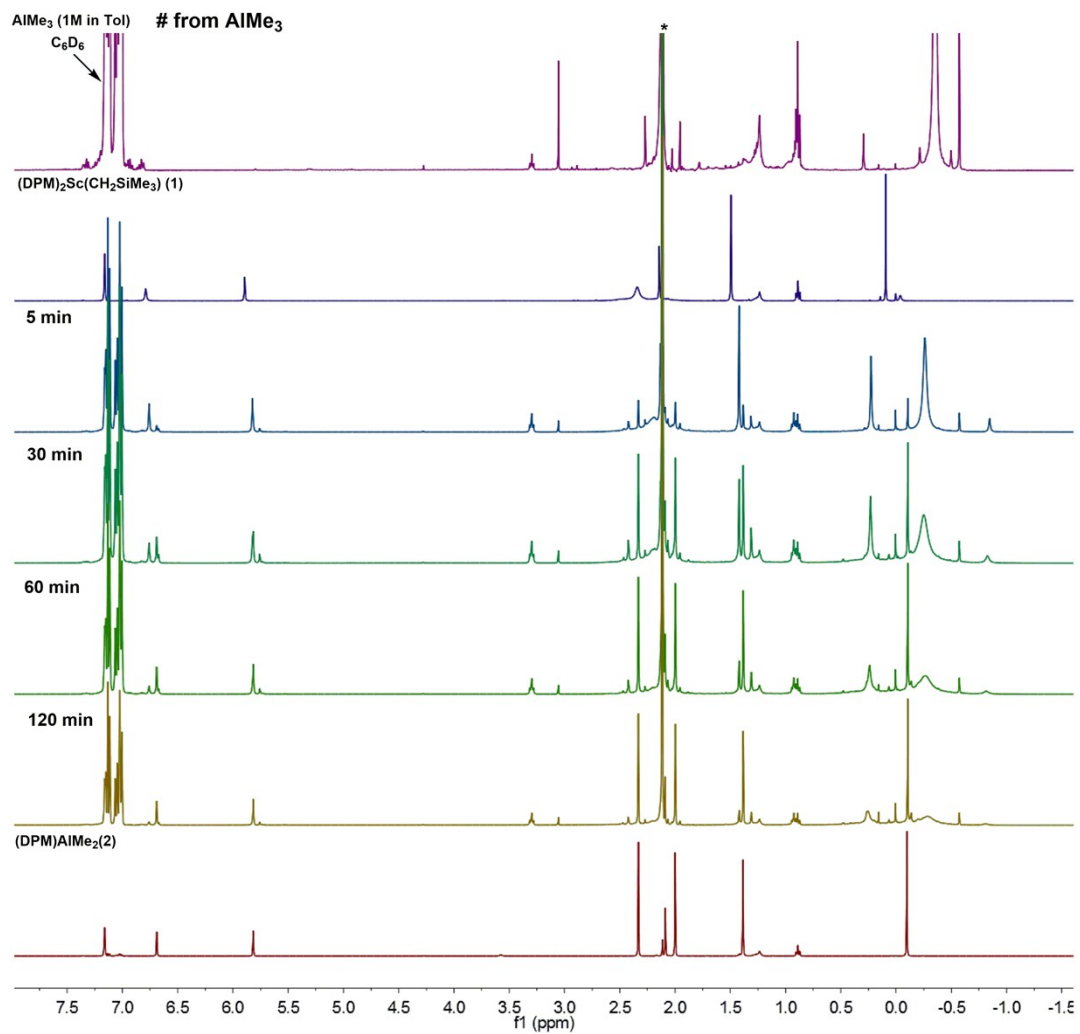

**Figure 29.** *In-situ* <sup>1</sup>H NMR spectra for the reaction of the complex **1** with AlMe<sub>3</sub> (1 M in toluene) under the molar ratio of [AlMe<sub>3</sub>]/[Sc] as 5/1 at different time in C<sub>6</sub>D<sub>6</sub> at 25 °C.

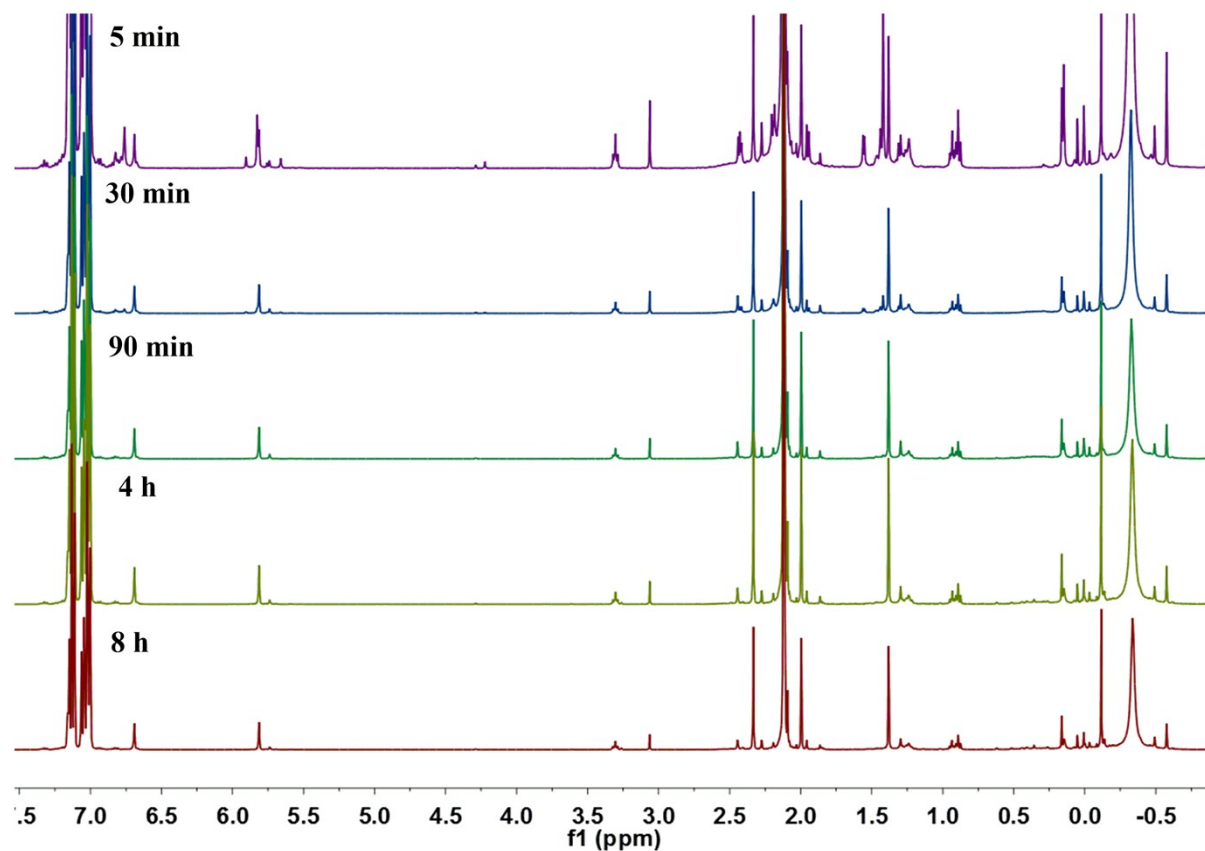

**Figure 30.** *In-situ* <sup>1</sup>H NMR spectra for the reaction of the complex **1** with AlMe<sub>3</sub> (1 M in toluene) under the molar ratio of [AlMe<sub>3</sub>]/[Sc] as 10/1 at different time in C<sub>6</sub>D<sub>6</sub> at 25 °C.

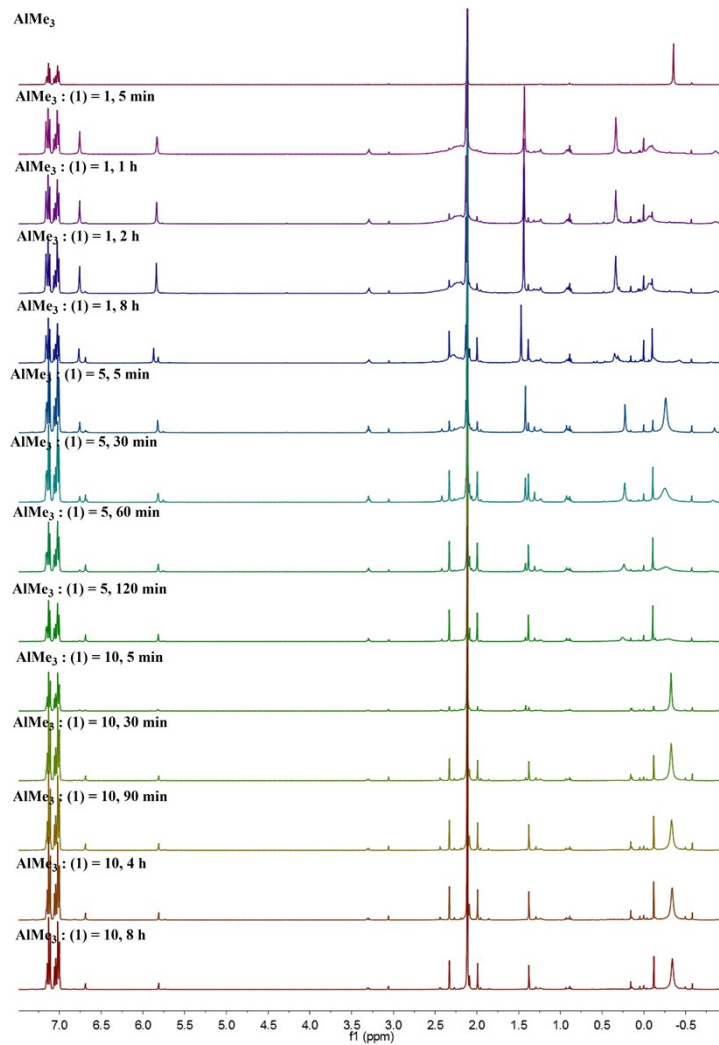

**Figure 31.** *In-situ* <sup>1</sup>H NMR spectra for the reaction of the complex **1** with AlMe<sub>3</sub> (1 M in toluene) at different the molar ratio at different time in C<sub>6</sub>D<sub>6</sub> at 25 °C.

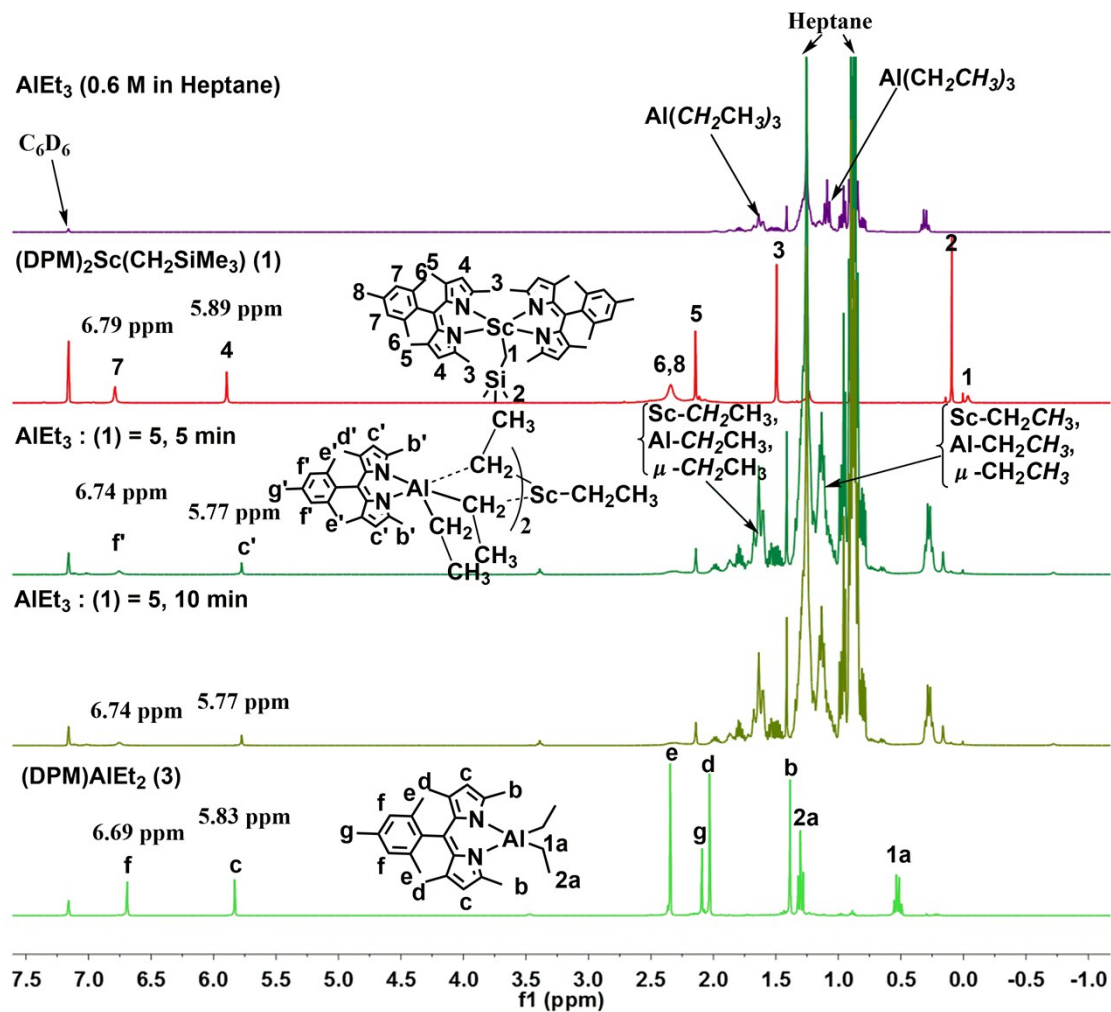

**Figure 32.** *In-situ*  $^1\text{H}$  NMR spectra for the reaction of the complex **1** with  $\text{AlEt}_3$  (0.6 M in heptane) under the molar ratio of  $[\text{AlEt}_3]/[\text{Sc}]$  as 5/1 at different time in  $\text{C}_6\text{D}_6$  at 25  $^\circ\text{C}$ . (The spectra show that no free  $(\text{DPM})\text{AlEt}_2$  were found in the solution, suggesting that the  $(\text{DPM})\text{AlEt}_2$  is a part of the resulting active species.)

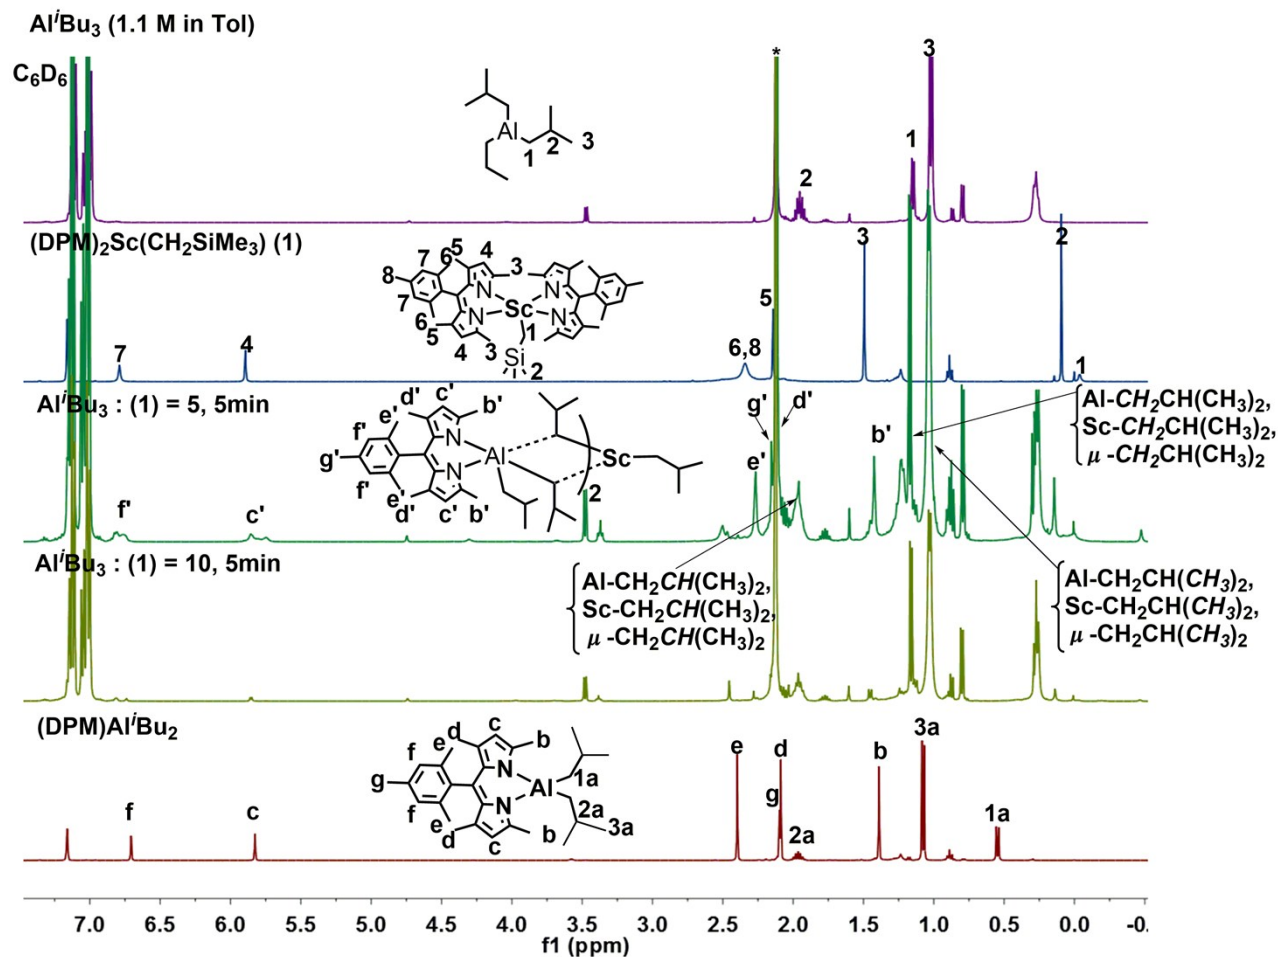

**Figure 33.** *In-situ* <sup>1</sup>H NMR spectra for the reaction of the complex **1** with Al<sup>i</sup>Bu<sub>3</sub> (1.1 M in toluene) under the molar ratio of [Al<sup>i</sup>Bu<sub>3</sub>]/[Sc] as 5/1 and 10/1 at different time in C<sub>6</sub>D<sub>6</sub> at 25 °C. (The spectra show that no free (DPM)Al<sup>i</sup>Bu<sub>2</sub> were found in the solution, suggesting that the (DPM)Al<sup>i</sup>Bu<sub>2</sub> is a part of the resulting active species.)

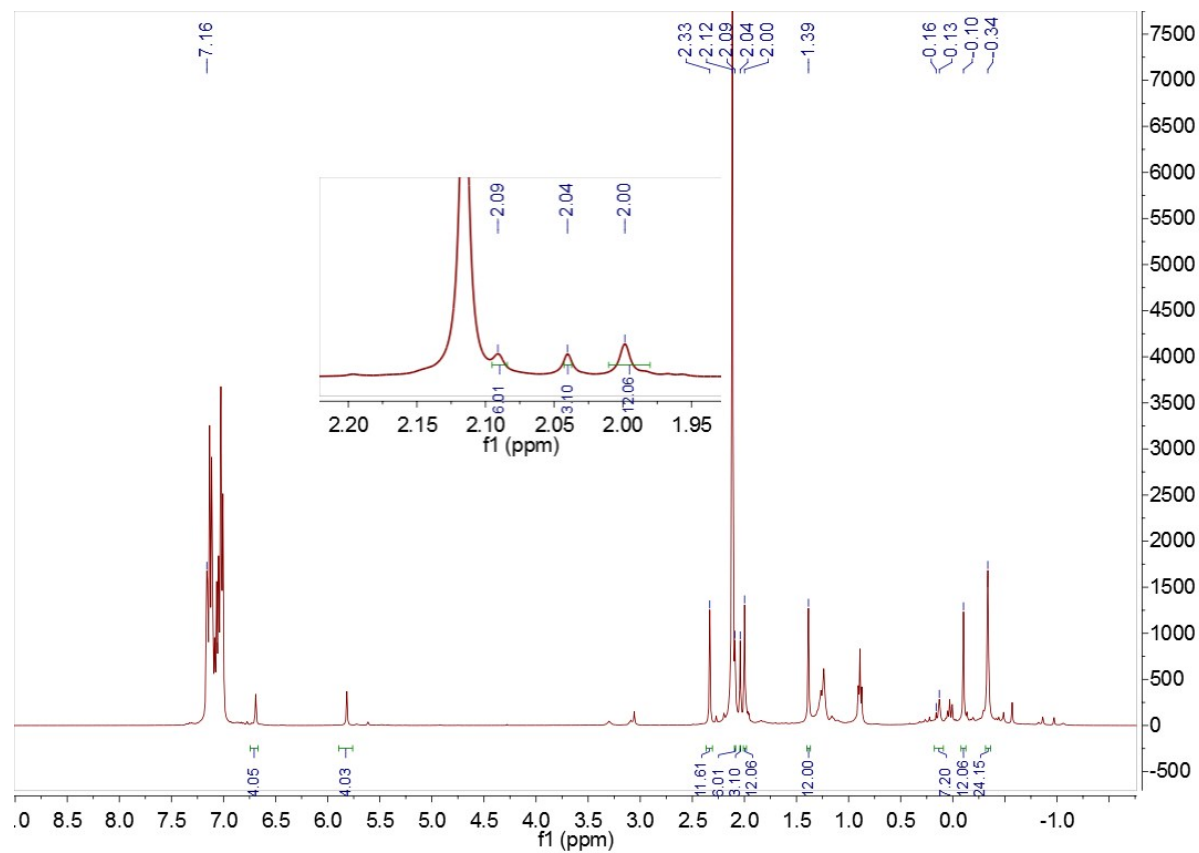

**SFigure 34.** *In-situ*  $^1\text{H}$  NMR spectrum for the reaction of the complex **1** with  $\text{AlMe}_3$  (1 M in toluene) under the molar ratio of  $[\text{AlMe}_3]/[\text{Sc}]$  as 5/1 after adding borate A in  $\text{C}_6\text{D}_6$  at 25  $^\circ\text{C}$ .

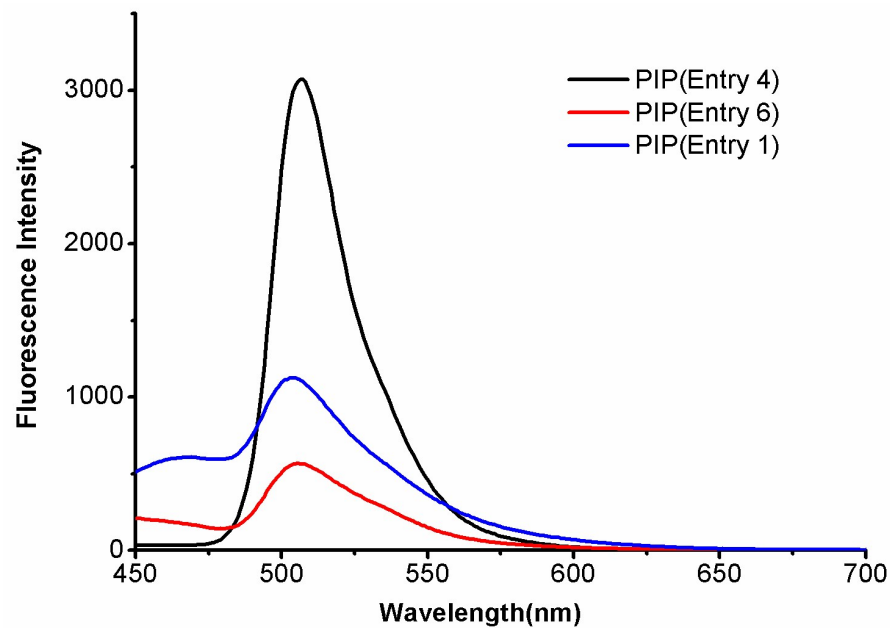

**Figure 35.** Fluorescence spectrum of the polyisoprenes by the  $1/\text{AlR}_3/[\text{Ph}_3\text{C}][\text{B}(\text{C}_6\text{F}_5)_4]$  systems in Table 1, entry 1, 4, 6.

**Table 1.** Crystal data, data collection and processing parameters for complexes **1 - 4**.

|                | 1                                                 | 2                                               | 3                                               | 4                                               |
|----------------|---------------------------------------------------|-------------------------------------------------|-------------------------------------------------|-------------------------------------------------|
| Formula        | $\text{C}_{48}\text{H}_{61}\text{N}_4\text{SiSc}$ | $\text{C}_{24}\text{H}_{31}\text{N}_2\text{Al}$ | $\text{C}_{26}\text{H}_{35}\text{N}_2\text{Al}$ | $\text{C}_{30}\text{H}_{43}\text{N}_2\text{Al}$ |
| Mw             | 767.05                                            | 374.49                                          | 402.54                                          | 458.64                                          |
| Crystal system | monoclinic                                        | triclinic                                       | monoclinic                                      | monoclinic                                      |
| Space group    | $\text{P}2_1/\text{c}$                            | $\text{P}-1$                                    | $\text{P}2_1/\text{c}$                          | $\text{P}2_1/\text{c}$                          |
| $a$ [Å]        | 15.263(3)                                         | 7.0719(14)                                      | 7.8769(16)                                      | 8.6985(17)                                      |
| $b$ [Å]        | 11.695(2)                                         | 11.897(2)                                       | 28.840(6)                                       | 11.354(2)                                       |
| $c$ [Å]        | 25.821(5)                                         | 15.148(3)                                       | 10.921(2)                                       | 28.622(6)                                       |



|                                                |                                                                 |                                                                |                                                                |                                                                |
|------------------------------------------------|-----------------------------------------------------------------|----------------------------------------------------------------|----------------------------------------------------------------|----------------------------------------------------------------|
| $\alpha$ [°]                                   | 90                                                              | 76.92(3)                                                       | 90                                                             | 90                                                             |
| $\beta$ [°]                                    | 106.57(3)                                                       | 86.12(3)                                                       | 106.63(3)                                                      | 94.73(3)                                                       |
| $\gamma$ [°]                                   | 90                                                              | 85.20(3)                                                       | 90                                                             | 90                                                             |
| V [Å <sup>3</sup> ]                            | 4417.8(17)                                                      | 1235.5(5)                                                      | 2377.1(9)                                                      | 2817.1(10)                                                     |
| Z                                              | 4                                                               | 2                                                              | 4                                                              | 4                                                              |
| $\rho_{calcd}$ [gcm <sup>-3</sup> ]            | 1.153                                                           | 1.007                                                          | 1.125                                                          | 1.081                                                          |
| $\mu$ [mm <sup>-1</sup> ]                      | 0.230                                                           | 0.091                                                          | 0.099                                                          | 0.091                                                          |
| F (000)                                        | 1648.0                                                          | 404.0                                                          | 872.0                                                          | 1000.0                                                         |
| $\theta$ range [°]                             | 4.47 to 62.982                                                  | 3.966 to 63.014                                                | 5.58 to 63.012                                                 | 4.586 to 63.002                                                |
| no of reflns collected                         | 65886                                                           | 15469                                                          | 23487                                                          | 41434                                                          |
| no of indep reflns                             | 14652[R <sub>int</sub> =0.0578,<br>R <sub>sigma</sub> = 0.0676] | 7995[R <sub>int</sub> =0.0311,<br>R <sub>sigma</sub> = 0.0672] | 7873[R <sub>int</sub> =0.0383,<br>R <sub>sigma</sub> = 0.0490] | 9322[R <sub>int</sub> =0.0254,<br>R <sub>sigma</sub> = 0.0224] |
| no of data / restraints<br>/ params            | 14652/0/504                                                     | 7995/0/253                                                     | 7873/0/271                                                     | 9322/0/308                                                     |
| GOF                                            | 1.114                                                           | 0.951                                                          | 1.105                                                          | 1.078                                                          |
| Final R indexes [I>2 $\sigma$<br>(I)]          | R <sub>1</sub> =0.0603,wR <sub>2</sub> =0.1<br>467              | R <sub>1</sub> =0.0478,wR <sub>2</sub> =0.<br>1236             | R <sub>1</sub> =0.0581,wR <sub>2</sub> =0.<br>1509             | R <sub>1</sub> =0.0509,wR <sub>2</sub> =0.<br>1359             |
| Final R indexes(all<br>data)                   | R <sub>1</sub> =0.0748,wR <sub>2</sub> =0.1<br>564              | R <sub>1</sub> =0.0737,wR <sub>2</sub> =0.<br>1336             | R <sub>1</sub> =0.0683,wR <sub>2</sub> =0.<br>1597             | R <sub>1</sub> =0.0564,wR <sub>2</sub> =0.<br>1411             |
| Largest diff.<br>peak/hole / e Å <sup>-3</sup> | 0.33/-0.48                                                      | 0.32/-0.17                                                     | 0.34/-0.40                                                     | 0.38/-0.30                                                     |

## Crystal Data

### Bond length of Complex 1

| Atom | Atom | Length/Å   | Atom | Atom | Length/Å |
|------|------|------------|------|------|----------|
| Sc1  | N1   | 2.1883(14) | C12  | C15  | 1.501(2) |
| Sc1  | N2   | 2.1495(14) | C13  | C14  | 1.410(2) |
| Sc1  | N3   | 2.1919(14) | C14  | C16  | 1.497(2) |
| Sc1  | N4   | 2.1943(14) | C17  | C18  | 1.435(2) |
| Sc1  | C45  | 2.2605(18) | C18  | C19  | 1.384(2) |
| Si1  | C45  | 1.8396(19) | C18  | C21  | 1.504(2) |
| Si1  | C46  | 1.885(2)   | C19  | C20  | 1.401(2) |
| Si1  | C47  | 1.876(2)   | C20  | C22  | 1.495(2) |
| Si1  | C48  | 1.876(2)   | C23  | C24  | 1.505(2) |
| N1   | C11  | 1.408(2)   | C24  | C25  | 1.405(2) |
| N1   | C14  | 1.336(2)   | C25  | C26  | 1.376(2) |
| N2   | C17  | 1.4122(19) | C26  | C27  | 1.445(2) |
| N2   | C20  | 1.358(2)   | C26  | C44  | 1.505(2) |
| N3   | C29  | 1.4158(19) | C27  | C28  | 1.411(2) |
| N3   | C32  | 1.358(2)   | C28  | C29  | 1.414(2) |
| N4   | C24  | 1.342(2)   | C28  | C35  | 1.499(2) |
| N4   | C27  | 1.411(2)   | C29  | C30  | 1.438(2) |
| C1   | C2   | 1.509(2)   | C30  | C31  | 1.382(2) |

|     |     |          |     |     |          |
|-----|-----|----------|-----|-----|----------|
| C2  | C3  | 1.387(3) | C30 | C34 | 1.503(2) |
| C2  | C7  | 1.389(3) | C31 | C32 | 1.391(2) |
| C3  | C4  | 1.393(2) | C32 | C33 | 1.499(2) |
| C4  | C5  | 1.403(2) | C35 | C36 | 1.404(2) |
| C4  | C8  | 1.510(2) | C35 | C40 | 1.405(2) |
| C5  | C6  | 1.401(2) | C36 | C37 | 1.394(2) |
| C5  | C10 | 1.499(2) | C36 | C42 | 1.510(2) |
| C6  | C7  | 1.396(2) | C37 | C38 | 1.392(3) |
| C6  | C9  | 1.508(3) | C38 | C39 | 1.393(3) |
| C10 | C11 | 1.405(2) | C38 | C43 | 1.512(3) |
| C10 | C17 | 1.414(2) | C39 | C40 | 1.395(2) |
| C11 | C12 | 1.448(2) | C40 | C41 | 1.505(2) |
| C12 | C13 | 1.378(2) |     |     |          |

---

Angel of Complex 1

| Atom | Atom | Atom | Angle/°   | Atom | Atom | Atom | Angle/°    |
|------|------|------|-----------|------|------|------|------------|
| N1   | Sc1  | N3   | 93.73(6)  | N1   | C14  | C13  | 111.18(14) |
| N1   | Sc1  | N4   | 170.27(5) | N1   | C14  | C16  | 122.54(15) |
| N1   | Sc1  | C45  | 86.36(6)  | C13  | C14  | C16  | 126.27(15) |
| N2   | Sc1  | N1   | 83.61(5)  | N2   | C17  | C10  | 123.11(13) |

|     |     |     |            |     |     |     |            |
|-----|-----|-----|------------|-----|-----|-----|------------|
| N2  | Sc1 | N3  | 104.08(5)  | N2  | C17 | C18 | 108.28(13) |
| N2  | Sc1 | N4  | 105.45(5)  | C10 | C17 | C18 | 128.24(14) |
| N2  | Sc1 | C45 | 115.43(6)  | C17 | C18 | C21 | 131.05(15) |
| N3  | Sc1 | N4  | 80.74(6)   | C19 | C18 | C17 | 106.16(14) |
| N3  | Sc1 | C45 | 140.20(6)  | C19 | C18 | C21 | 122.79(15) |
| N4  | Sc1 | C45 | 92.76(6)   | C18 | C19 | C20 | 108.38(14) |
| C45 | Si1 | C46 | 113.48(10) | N2  | C20 | C19 | 110.23(14) |
| C45 | Si1 | C47 | 111.40(10) | N2  | C20 | C22 | 123.50(14) |
| C45 | Si1 | C48 | 112.11(9)  | C19 | C20 | C22 | 126.27(15) |
| C47 | Si1 | C46 | 105.63(11) | N4  | C24 | C23 | 123.31(15) |
| C48 | Si1 | C46 | 105.96(10) | N4  | C24 | C25 | 110.81(15) |
| C48 | Si1 | C47 | 107.82(11) | C25 | C24 | C23 | 125.88(16) |
| C11 | N1  | Sc1 | 122.05(10) | C26 | C25 | C24 | 108.31(15) |
| C14 | N1  | Sc1 | 124.68(11) | C25 | C26 | C27 | 105.75(14) |
| C14 | N1  | C11 | 106.92(13) | C25 | C26 | C44 | 123.66(15) |
| C17 | N2  | Sc1 | 124.45(10) | C27 | C26 | C44 | 130.59(16) |
| C20 | N2  | Sc1 | 126.79(10) | N4  | C27 | C26 | 108.31(13) |
| C20 | N2  | C17 | 106.90(13) | N4  | C27 | C28 | 123.08(13) |
| C29 | N3  | Sc1 | 124.45(10) | C28 | C27 | C26 | 128.52(14) |

|     |    |     |            |     |     |     |            |
|-----|----|-----|------------|-----|-----|-----|------------|
| C32 | N3 | Sc1 | 125.02(11) | C27 | C28 | C29 | 126.61(14) |
| C32 | N3 | C29 | 106.30(13) | C27 | C28 | C35 | 116.60(13) |
| C24 | N4 | Sc1 | 124.41(11) | C29 | C28 | C35 | 116.75(13) |
| C24 | N4 | C27 | 106.80(13) | N3  | C29 | C30 | 108.49(13) |
| C27 | N4 | Sc1 | 126.99(10) | C28 | C29 | N3  | 122.82(13) |
| C3  | C2 | C1  | 120.3(2)   | C28 | C29 | C30 | 128.10(14) |
| C3  | C2 | C7  | 118.34(16) | C29 | C30 | C34 | 131.98(15) |
| C7  | C2 | C1  | 121.3(2)   | C31 | C30 | C29 | 105.68(14) |
| C2  | C3 | C4  | 121.99(17) | C31 | C30 | C34 | 122.30(15) |
| C3  | C4 | C5  | 118.72(16) | C30 | C31 | C32 | 108.80(15) |
| C3  | C4 | C8  | 119.66(15) | N3  | C32 | C31 | 110.65(14) |
| C5  | C4 | C8  | 121.61(14) | N3  | C32 | C33 | 124.40(16) |
| C4  | C5 | C10 | 119.30(14) | C31 | C32 | C33 | 124.90(15) |
| C6  | C5 | C4  | 120.39(14) | C36 | C35 | C28 | 120.41(14) |
| C6  | C5 | C10 | 120.30(14) | C36 | C35 | C40 | 120.18(14) |
| C5  | C6 | C9  | 120.41(16) | C40 | C35 | C28 | 119.41(13) |
| C7  | C6 | C5  | 118.83(17) | C35 | C36 | C42 | 120.92(15) |
| C7  | C6 | C9  | 120.76(17) | C37 | C36 | C35 | 118.93(16) |
| C2  | C7 | C6  | 121.71(17) | C37 | C36 | C42 | 120.14(15) |

|     |     |     |            |     |     |     |            |
|-----|-----|-----|------------|-----|-----|-----|------------|
| C11 | C10 | C5  | 116.10(13) | C38 | C37 | C36 | 121.95(16) |
| C11 | C10 | C17 | 127.90(14) | C37 | C38 | C39 | 118.13(16) |
| C17 | C10 | C5  | 115.86(13) | C37 | C38 | C43 | 121.94(18) |
| N1  | C11 | C12 | 108.26(13) | C39 | C38 | C43 | 119.93(18) |
| C10 | C11 | N1  | 123.55(13) | C38 | C39 | C40 | 121.83(16) |
| C10 | C11 | C12 | 128.13(14) | C35 | C40 | C41 | 121.23(14) |
| C11 | C12 | C15 | 131.09(14) | C39 | C40 | C35 | 118.97(15) |
| C13 | C12 | C11 | 105.85(13) | C39 | C40 | C41 | 119.79(15) |
| C13 | C12 | C15 | 122.92(14) | Si1 | C45 | Sc1 | 132.76(9)  |
| C12 | C13 | C14 | 107.77(14) |     |     |     |            |

---

Bond length of Complex 2

| Atom | Atom | Length/Å   | Atom | Atom | Length/Å   |
|------|------|------------|------|------|------------|
| Al1  | N1   | 1.9055(13) | C7   | C17  | 1.4027(17) |
| Al1  | N2   | 1.9058(13) | C8   | C9   | 1.3976(18) |
| Al1  | C23  | 1.9710(15) | C8   | C13  | 1.4021(17) |
| Al1  | C24  | 1.9681(15) | C9   | C10  | 1.3908(18) |
| N1   | C2   | 1.3511(16) | C9   | C14  | 1.5089(19) |
| N1   | C6   | 1.4040(16) | C10  | C11  | 1.386(2)   |
| N2   | C17  | 1.4085(16) | C11  | C12  | 1.390(2)   |

|    |     |            |     |     |            |
|----|-----|------------|-----|-----|------------|
| N2 | C21 | 1.3471(16) | C11 | C15 | 1.506(2)   |
| C1 | C2  | 1.4890(18) | C12 | C13 | 1.3924(18) |
| C2 | C3  | 1.3989(18) | C13 | C16 | 1.5076(19) |
| C3 | C4  | 1.3808(18) | C17 | C18 | 1.4390(18) |
| C4 | C5  | 1.5029(18) | C18 | C19 | 1.504(2)   |
| C4 | C6  | 1.4376(17) | C18 | C20 | 1.3776(19) |
| C6 | C7  | 1.4068(17) | C20 | C21 | 1.404(2)   |
| C7 | C8  | 1.4939(17) | C21 | C22 | 1.4849(19) |

### Angel of Complex 2

| Atom | Atom | Atom | Angle <sup>o</sup> | Atom | Atom | Atom | Angle <sup>o</sup> |
|------|------|------|--------------------|------|------|------|--------------------|
| N1   | All  | N2   | 94.12(5)           | C9   | C8   | C7   | 119.35(11)         |
| N1   | All  | C23  | 110.03(6)          | C9   | C8   | C13  | 120.35(11)         |
| N1   | All  | C24  | 111.10(6)          | C13  | C8   | C7   | 120.28(11)         |
| N2   | All  | C23  | 111.98(6)          | C8   | C9   | C14  | 121.04(12)         |
| N2   | All  | C24  | 109.24(6)          | C10  | C9   | C8   | 118.83(12)         |
| C24  | All  | C23  | 117.85(7)          | C10  | C9   | C14  | 120.12(12)         |
| C2   | N1   | All  | 125.18(9)          | C11  | C10  | C9   | 122.11(13)         |
| C2   | N1   | C6   | 107.69(11)         | C10  | C11  | C12  | 117.99(12)         |
| C6   | N1   | All  | 127.06(9)          | C10  | C11  | C15  | 121.47(14)         |

|     |    |     |            |     |     |     |            |
|-----|----|-----|------------|-----|-----|-----|------------|
| C17 | N2 | Al1 | 126.99(8)  | C12 | C11 | C15 | 120.54(13) |
| C21 | N2 | Al1 | 125.80(9)  | C11 | C12 | C13 | 121.91(12) |
| C21 | N2 | C17 | 107.17(11) | C8  | C13 | C16 | 121.14(12) |
| N1  | C2 | C1  | 122.38(12) | C12 | C13 | C8  | 118.76(12) |
| N1  | C2 | C3  | 109.92(12) | C12 | C13 | C16 | 120.10(12) |
| C3  | C2 | C1  | 127.69(13) | N2  | C17 | C18 | 108.20(11) |
| C4  | C3 | C2  | 108.40(11) | C7  | C17 | N2  | 122.82(11) |
| C3  | C4 | C5  | 122.95(12) | C7  | C17 | C18 | 128.97(12) |
| C3  | C4 | C6  | 106.22(11) | C17 | C18 | C19 | 130.70(12) |
| C6  | C4 | C5  | 130.81(12) | C20 | C18 | C17 | 105.92(12) |
| N1  | C6 | C4  | 107.76(11) | C20 | C18 | C19 | 123.37(13) |
| N1  | C6 | C7  | 122.76(11) | C18 | C20 | C21 | 108.47(12) |
| C7  | C6 | C4  | 129.46(11) | N2  | C21 | C20 | 110.24(12) |
| C6  | C7 | C8  | 116.31(11) | N2  | C21 | C22 | 122.84(13) |
| C17 | C7 | C6  | 126.05(11) | C20 | C21 | C22 | 126.91(13) |
| C17 | C7 | C8  | 117.60(11) |     |     |     |            |

---

Bond length of Complex 3

| Atom | Atom | Length/Å   | Atom | Atom | Length/Å   |
|------|------|------------|------|------|------------|
| Al1  | N1   | 1.9134(13) | C6   | C7   | 1.3890(18) |



|     |     |            |     |     |            |
|-----|-----|------------|-----|-----|------------|
| Al1 | N2  | 1.9067(12) | C6  | C9  | 1.5061(19) |
| Al1 | C23 | 1.9768(17) | C10 | C11 | 1.497(2)   |
| Al1 | C25 | 1.9725(15) | C11 | C12 | 1.399(2)   |
| N1  | C11 | 1.3458(17) | C12 | C13 | 1.3776(19) |
| N1  | C15 | 1.4092(16) | C13 | C14 | 1.4984(19) |
| N2  | C17 | 1.4056(15) | C13 | C15 | 1.4393(18) |
| N2  | C21 | 1.3475(17) | C15 | C16 | 1.4040(17) |
| C1  | C2  | 1.509(2)   | C16 | C17 | 1.4052(17) |
| C2  | C3  | 1.388(2)   | C17 | C18 | 1.4384(17) |
| C2  | C7  | 1.391(2)   | C18 | C19 | 1.4988(19) |
| C3  | C4  | 1.3933(19) | C18 | C20 | 1.3780(19) |
| C4  | C5  | 1.3985(17) | C20 | C21 | 1.3986(19) |
| C4  | C8  | 1.506(2)   | C21 | C22 | 1.4935(19) |
| C5  | C6  | 1.4045(17) | C23 | C24 | 1.518(3)   |
| C5  | C16 | 1.4990(16) | C25 | C26 | 1.529(2)   |

---

Angel of Complex 3

| Atom | Atom | Atom | Angle/°   | Atom | Atom | Atom | Angle/°    |
|------|------|------|-----------|------|------|------|------------|
| N1   | Al1  | C23  | 112.83(7) | N1   | C11  | C10  | 122.37(13) |
| N1   | Al1  | C25  | 108.31(6) | N1   | C11  | C12  | 110.34(12) |

|     |     |     |            |     |     |     |            |
|-----|-----|-----|------------|-----|-----|-----|------------|
| N2  | A11 | N1  | 94.44(5)   | C12 | C11 | C10 | 127.23(13) |
| N2  | A11 | C23 | 108.59(7)  | C13 | C12 | C11 | 108.50(12) |
| N2  | A11 | C25 | 109.27(6)  | C12 | C13 | C14 | 123.59(13) |
| C25 | A11 | C23 | 120.29(7)  | C12 | C13 | C15 | 105.96(12) |
| C11 | N1  | A11 | 125.69(10) | C15 | C13 | C14 | 130.43(12) |
| C11 | N1  | C15 | 107.20(11) | N1  | C15 | C13 | 108.00(11) |
| C15 | N1  | A11 | 126.32(9)  | C16 | C15 | N1  | 122.81(11) |
| C17 | N2  | A11 | 126.77(9)  | C16 | C15 | C13 | 129.17(12) |
| C21 | N2  | A11 | 125.90(9)  | C15 | C16 | C5  | 117.13(11) |
| C21 | N2  | C17 | 107.33(11) | C15 | C16 | C17 | 126.31(11) |
| C3  | C2  | C1  | 121.33(15) | C17 | C16 | C5  | 116.49(10) |
| C3  | C2  | C7  | 118.28(12) | N2  | C17 | C18 | 107.94(11) |
| C7  | C2  | C1  | 120.39(15) | C16 | C17 | N2  | 122.85(11) |
| C2  | C3  | C4  | 121.81(13) | C16 | C17 | C18 | 129.18(11) |
| C3  | C4  | C5  | 118.81(12) | C17 | C18 | C19 | 130.31(12) |
| C3  | C4  | C8  | 120.31(13) | C20 | C18 | C17 | 106.09(11) |
| C5  | C4  | C8  | 120.88(12) | C20 | C18 | C19 | 123.59(12) |
| C4  | C5  | C6  | 120.48(11) | C18 | C20 | C21 | 108.37(12) |
| C4  | C5  | C16 | 121.03(11) | N2  | C21 | C20 | 110.27(12) |

|    |    |     |            |     |     |     |            |
|----|----|-----|------------|-----|-----|-----|------------|
| C6 | C5 | C16 | 118.48(11) | N2  | C21 | C22 | 122.52(13) |
| C5 | C6 | C9  | 121.03(12) | C20 | C21 | C22 | 127.21(13) |
| C7 | C6 | C5  | 118.73(12) | C24 | C23 | A11 | 114.00(13) |
| C7 | C6 | C9  | 120.25(12) | C26 | C25 | A11 | 113.42(11) |
| C6 | C7 | C2  | 121.89(13) |     |     |     |            |

---

Bond length of Complex 4

| Atom | Atom | Length/Å   | Atom | Atom | Length/Å   |
|------|------|------------|------|------|------------|
| A11  | N1   | 1.9098(9)  | C10  | C11  | 1.4995(15) |
| A11  | N2   | 1.9091(10) | C11  | C12  | 1.3807(15) |
| A11  | C23  | 1.9835(11) | C11  | C15  | 1.4420(14) |
| A11  | C27  | 1.9779(12) | C12  | C13  | 1.4051(15) |
| N1   | C13  | 1.3443(14) | C13  | C14  | 1.4948(15) |
| N1   | C15  | 1.4076(12) | C15  | C16  | 1.4023(14) |
| N2   | C17  | 1.4068(13) | C16  | C17  | 1.4099(14) |
| N2   | C20  | 1.3445(14) | C17  | C18  | 1.4375(15) |
| C1   | C2   | 1.3931(16) | C18  | C19  | 1.3824(17) |
| C1   | C6   | 1.3915(16) | C18  | C21  | 1.4992(16) |
| C1   | C7   | 1.5081(16) | C19  | C20  | 1.4000(17) |
| C2   | C3   | 1.3920(14) | C20  | C22  | 1.4958(17) |

|    |     |            |     |     |            |
|----|-----|------------|-----|-----|------------|
| C3 | C4  | 1.4023(14) | C23 | C25 | 1.5265(16) |
| C3 | C8  | 1.5057(15) | C24 | C25 | 1.520(2)   |
| C4 | C5  | 1.4034(14) | C25 | C26 | 1.5289(17) |
| C4 | C16 | 1.4971(13) | C27 | C29 | 1.5354(15) |
| C5 | C6  | 1.3928(14) | C28 | C29 | 1.5259(18) |
| C5 | C9  | 1.5082(15) | C29 | C30 | 1.5291(16) |

---

Angel of Complex 4

| Atom | Atom | Atom | Angle/°   | Atom | Atom | Atom | Angle/°    |
|------|------|------|-----------|------|------|------|------------|
| N1   | Al1  | C23  | 110.18(4) | C11  | C12  | C13  | 108.27(10) |
| N1   | Al1  | C27  | 112.30(5) | N1   | C13  | C12  | 110.22(9)  |
| N2   | Al1  | N1   | 93.85(4)  | N1   | C13  | C14  | 122.67(10) |
| N2   | Al1  | C23  | 112.74(5) | C12  | C13  | C14  | 127.11(10) |
| N2   | Al1  | C27  | 111.04(5) | N1   | C15  | C11  | 107.85(9)  |
| C27  | Al1  | C23  | 114.89(5) | C16  | C15  | N1   | 122.80(9)  |
| C13  | N1   | Al1  | 125.11(7) | C16  | C15  | C11  | 129.34(9)  |
| C13  | N1   | C15  | 107.59(8) | C15  | C16  | C4   | 117.78(9)  |
| C15  | N1   | Al1  | 127.25(7) | C15  | C16  | C17  | 125.86(9)  |
| C17  | N2   | Al1  | 126.95(7) | C17  | C16  | C4   | 116.37(9)  |
| C20  | N2   | Al1  | 125.30(8) | N2   | C17  | C16  | 122.79(9)  |

|     |     |     |            |     |     |     |            |
|-----|-----|-----|------------|-----|-----|-----|------------|
| C20 | N2  | C17 | 107.46(9)  | N2  | C17 | C18 | 107.93(9)  |
| C2  | C1  | C7  | 120.78(11) | C16 | C17 | C18 | 129.25(10) |
| C6  | C1  | C2  | 118.03(10) | C17 | C18 | C21 | 130.99(11) |
| C6  | C1  | C7  | 121.18(11) | C19 | C18 | C17 | 106.03(10) |
| C3  | C2  | C1  | 121.98(10) | C19 | C18 | C21 | 122.93(10) |
| C2  | C3  | C4  | 118.95(9)  | C18 | C19 | C20 | 108.25(10) |
| C2  | C3  | C8  | 120.29(9)  | N2  | C20 | C19 | 110.31(10) |
| C4  | C3  | C8  | 120.75(9)  | N2  | C20 | C22 | 122.90(11) |
| C3  | C4  | C5  | 120.12(9)  | C19 | C20 | C22 | 126.79(11) |
| C3  | C4  | C16 | 119.59(9)  | C25 | C23 | All | 117.57(7)  |
| C5  | C4  | C16 | 120.28(8)  | C23 | C25 | C26 | 112.66(10) |
| C4  | C5  | C9  | 120.86(9)  | C24 | C25 | C23 | 110.56(12) |
| C6  | C5  | C4  | 119.10(9)  | C24 | C25 | C26 | 109.41(11) |
| C6  | C5  | C9  | 120.04(9)  | C29 | C27 | All | 118.18(7)  |
| C1  | C6  | C5  | 121.80(10) | C28 | C29 | C27 | 111.72(9)  |
| C12 | C11 | C10 | 123.34(10) | C28 | C29 | C30 | 110.11(10) |
| C12 | C11 | C15 | 106.06(9)  | C30 | C29 | C27 | 111.48(10) |
| C15 | C11 | C10 | 130.60(10) |     |     |     |            |

---

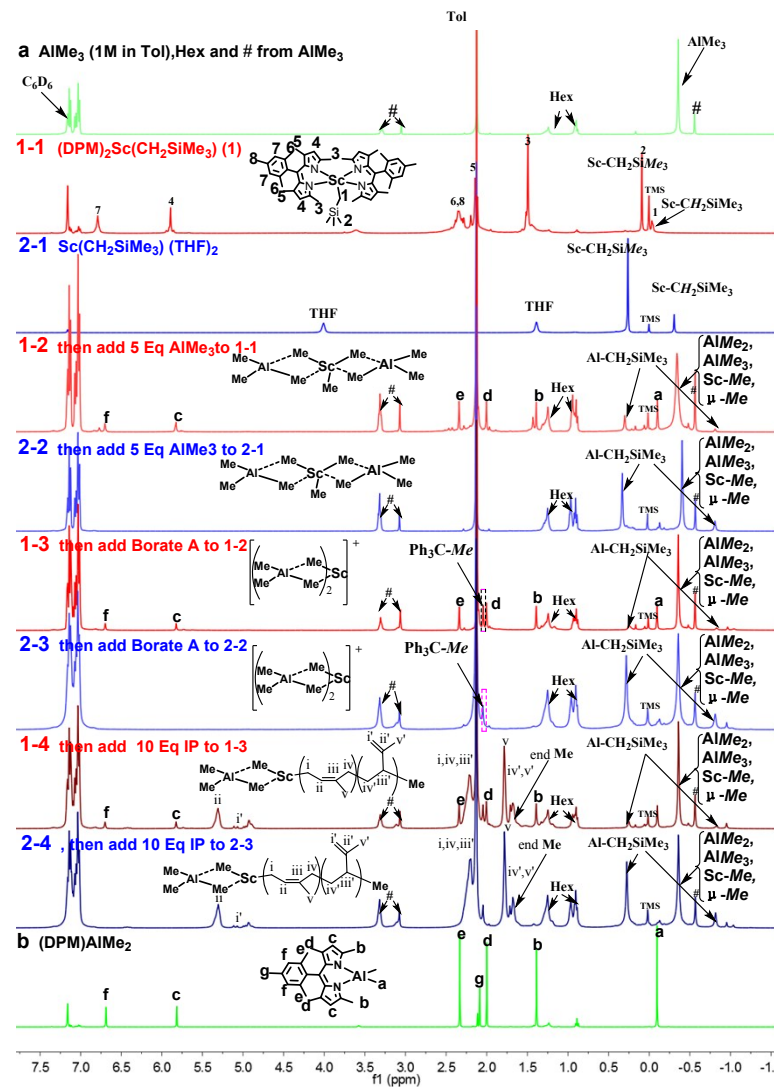

SFigure 36. *In-situ*  $^1\text{H}$  NMR spectrum under different catalyst system at 25 °C in  $\text{C}_6\text{D}_6$ .

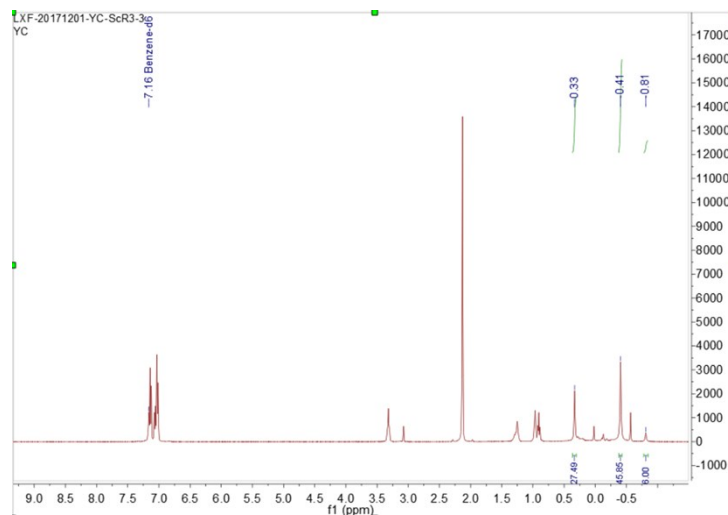

SFigure 37. The original *in-situ* <sup>1</sup>H NMR spectrum of SFigure 36 : 2-2.

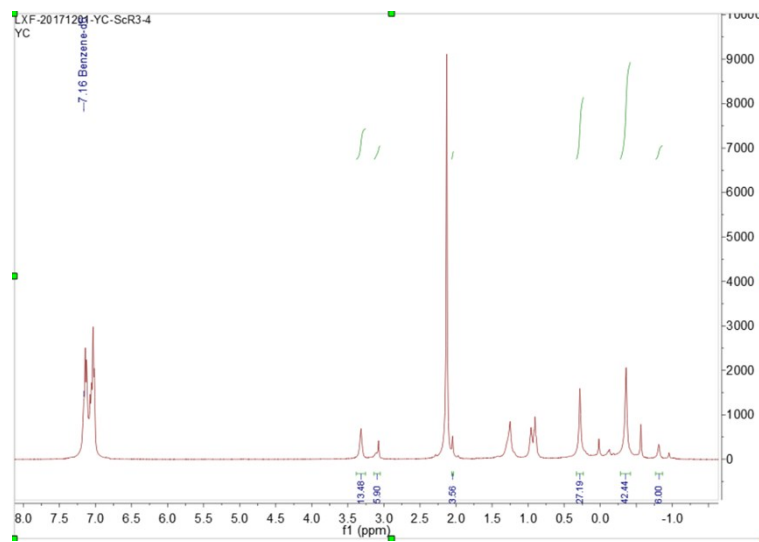

SFigure 38. The original *in-situ* <sup>1</sup>H NMR spectrum of SFigure 36 : 2-3.





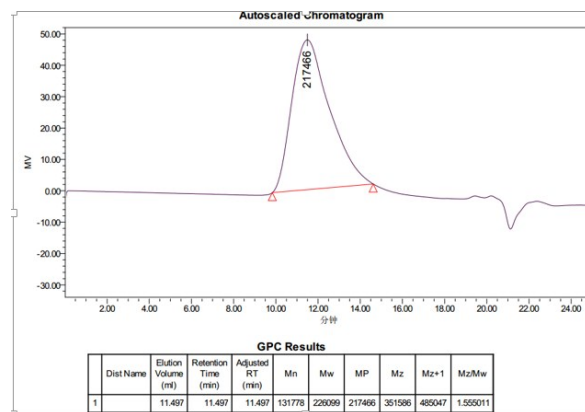

SFigure 41. GPC profiles of the polyisoprenes by  $\text{Sc}(\text{CH}_2\text{SiMe}_3)_3(\text{THF})_2/\text{AlMe}_3/[\text{Ph}_3\text{C}][\text{B}(\text{C}_6\text{F}_5)_4]$  systems in Table 1, entry 14.
